# Supplementary material
Source: Research Square preprint supplement (doi:10.21203/rs.3.rs-10244607/v1)
Supplement: Supplementary file 2 [file 18656940e172395594a4da71.docx]

**Leaving a trace: a meta-analysis of the legacy effects of invasive species**

**List of studies included in the review**

1. Afzal, M. R., Naz, M., Ullah, R., & Du, D. (2024). Persistence of root exudates of sorghum bicolor and Solidago canadensis: Impacts on invasive and native species. *Plants*, *13*(1), 58. <https://doi.org/10.3390/plants13010058>
2. Ahmad, R., Rashid, I., Hamid, M., Malik, A. H., & Khuroo, A. A. (2021). Invasion shadows in soil system overshadow the restoration of invaded ecosystems: Implications for invasive plant management. *Ecological Engineering*, *164*, 106219. <https://doi.org/10.1016/j.ecoleng.2021.106219>
3. Allen, W. J., Meyerson, L. A., Flick, A. J., & Cronin, J. T. (2018). Intraspecific variation in indirect plant–soil feedbacks influences a wetland plant invasion. *Ecology*, *99*(6), 1430-1440. <https://doi.org/10.1002/ecy.2344>
4. Anthony, M. A., Stinson, K. A., Trautwig, A. N., Coates-Connor, E., & Frey, S. D. (2019). Fungal communities do not recover after removing invasive Alliaria petiolata (garlic mustard). *Biological invasions*, *21*(10), 3085-3099. <https://doi.org/10.1007/s10530-019-02031-8>
5. Broadbent, A. A., Orwin, K. H., Peltzer, D. A., Dickie, I. A., Mason, N. W., Ostle, N. J., & Stevens, C. J. (2017). Invasive N-fixer impacts on litter decomposition driven by changes to soil properties not litter quality. *Ecosystems*, *20*(6), 1151-1163. <https://doi.org/10.1007/s10021-016-0099-3>
6. Carter, D. R., Slesak, R. A., Harrington, T. B., Peter, D. H., & D’Amato, A. W. (2019). Scotch broom (Cytisus scoparius) modifies microenvironment to promote nonnative plant communities. *Biological Invasions*, *21*(4), 1055-1073. <https://doi.org/10.1007/s10530-018-1885-y>
7. Connell, R. K., Zeglin, L. H., & Blair, J. M. (2021). Plant legacies and soil microbial community dynamics control soil respiration. *Soil Biology and Biochemistry*, *160*, 108350. <https://doi.org/10.1016/j.soilbio.2021.108350>
8. Crocker, E. V., Nelson, E. B., & Blossey, B. (2017). Soil conditioning effects of Phragmites australis on native wetland plant seedling survival. *Ecology and Evolution*, *7*(15), 5571-5579. [https://doi.org/10.1002/ece3.3024](https://doi.org/10.1002/ece3.3024%20)
9. Dickie, I. A., St John, M. G., Yeates, G. W., Morse, C. W., Bonner, K. I., Orwin, K., & Peltzer, D. A. (2014). Belowground legacies of Pinus contorta invasion and removal result in multiple mechanisms of invasional meltdown. *AoB plants*, *6*, plu056. <https://doi.org/10.1093/aobpla/plu056>
10. Elgersma, K. J., Yu, S., Vor, T., & Ehrenfeld, J. G. (2012). Microbial-mediated feedbacks of leaf litter on invasive plant growth and interspecific competition. *Plant and Soil*, *356*(1), 341-355. <https://doi.org/10.1007/s11104-011-1117-z>
11. Fahey, C., & Flory, S. L. (2022). Soil microbes alter competition between native and invasive plants. *Journal of Ecology*, *110*(2), 404-414. <https://doi.org/10.1111/1365-2745.13807>
12. Fuselier, L. C., Carreiro, M., & Nason, L. (2017). Invasive species management impacts on native and nonnative ferns in an urban forest spore bank. *Castanea*, *83*(1), 28-37[. https://doi.org/10.2179/17-125](.%20https:/doi.org/10.2179/17-125)
13. Gallego, F., López‐Mársico, L., Tommasino, A., Altesor, A., Casás, M., & Rodríguez, C. (2023). Legacy effects after seven years of afforestation with Pinus taeda in a natural grassland. *Restoration Ecology*, *31*(4), e13865. <https://doi.org/10.1111/rec.13865>
14. Geddes, P., Grancharova, T., Kelly, J. J., Treering, D., & Tuchman, N. C. (2014). Effects of invasive Typha× glauca on wetland nutrient pools, denitrification, and bacterial communities are influenced by time since invasion. *Aquatic Ecology*, *48*(3), 247-258. <https://doi.org/10.1007/s10452-014-9480-5>
15. Grman, E., & Suding, K. N. (2010). Within‐year soil legacies contribute to strong priority effects of exotics on native California grassland communities. *Restoration Ecology*, *18*(5), 664-670. <https://doi.org/10.1111/j.1526-100X.2008.00497.x>
16. Grove, S., Haubensak, K. A., & Parker, I. M. (2012). Direct and indirect effects of allelopathy in the soil legacy of an exotic plant invasion. *Plant Ecology*, *213*(12), 1869-1882. <https://doi.org/10.1002/ecs2.70430>
17. Hagan, D. L., Jose, S., Bohn, K., & Escobedo, F. (2013). Cogongrass (Imperata cylindrica) invasion and eradication: implications for soil nutrient dynamics in a longleaf pine sandhill ecosystem. *Invasive Plant Science and Management*, *6*(3), 433-443. <https://doi.org/10.1614/IPSM-D-12-00089.1>
18. Holdredge, C., & Bertness, M. D. (2011). Litter legacy increases the competitive advantage of invasive Phragmites australis in New England wetlands. *Biological Invasions*, *13*(2), 423-433. <https://doi.org/10.1007/s10530-010-9836-2>
19. Hughes, R. F., Uowolo, A. L., & Togia, T. P. (2012). Recovery of native forest after removal of an invasive tree, Falcataria moluccana, in American Samoa. *Biological Invasions*, *14*(7), 1393-1413. <https://doi.org/10.1007/s10530-011-0164-y>
20. Jones, G. L., Tomlinson, M., Owen, R., Scullion, J., Winters, A., Jenkins, T., ... & Gwynn-Jones, D. (2019). Shrub establishment favoured and grass dominance reduced in acid heath grassland systems cleared of invasive Rhododendron ponticum. *Scientific Reports*, *9*(1), 2239. <https://doi.org/10.1038/s41598-019-38573-z>
21. Jordan, N. R., Larson, D. L., & Huerd, S. C. (2011). Evidence of qualitative differences between soil-occupancy effects of invasive vs. native grassland plant species. *Invasive Plant Science and Management*, *4*(1), 11-21. <https://doi.org/10.1614/IPSM-D-10-00004.1>
22. Kuebbing, S. E., Patterson, C. M., Classen, A. T., & Simberloff, D. (2016). Co‐occurring nonnative woody shrubs have additive and non‐additive soil legacies. *Ecological Applications*, *26*(6), 1896-1906. <https://doi.org/10.1890/15-1931.1>
23. Le Roux, J. J., Leishman, M. R., Geraghty, D., & Manea, A. (2024). The impacts of invasive African olive on native Australian legumes via altered soil conditions do not persist as legacy effects. *Plant and Soil*, *496*(1), 361-373. <https://doi.org/10.1007/s11104-023-06366-z>
24. Maclean, J. E., Mitchell, R. J., Burslem, D. F., Genney, D., Hall, J., & Pakeman, R. J. (2018). Understorey plant community composition reflects invasion history decades after invasive Rhododendron has been removed. *Journal of Applied Ecology*, *55*(2), 874-884. <https://doi.org/10.1111/1365-2664.12973>
25. Maoela, M. A., Jacobs, S. M., Roets, F., & Esler, K. J. (2016). Invasion, alien control and restoration: Legacy effects linked to folivorous insects and phylopathogenic fungi. *Austral Ecology*, *41*(8), 906-917. <https://doi.org/10.1111/aec.12383>
26. Meisner, A., De Boer, W., Cornelissen, J. H., & van der Putten, W. H. (2012). Reciprocal effects of litter from exotic and congeneric native plant species via soil nutrients. *PLoS One*, *7*(2), e31596. <https://doi.org/10.1371/journal.pone.0031596>
27. Nsikani, M. M., Gaertner, M., Latombe, G., & Esler, K. J. (2021). Soil nitrogen availability favours the growth but not germination of secondary invaders after clearing invasive Acacia saligna. *South African Journal of Botany*, *143*, 198-204. <https://doi.org/10.1016/j.sajb.2021.07.038>
28. Nsikani, M. M., Novoa, A., van Wilgen, B. W., Keet, J. H., & Gaertner, M. (2017). Acacia saligna's soil legacy effects persist up to 10 years after clearing: Implications for ecological restoration. *Austral Ecology*, *42*(8), 880-889. <https://doi.org/10.1111/aec.12515>
29. Parsons, L. S., & Becker, B. H. (2021). Invasion by Ammophila arenaria alters soil chemistry, leaving lasting legacy effects on restored coastal dunes in California. *Invasive Plant Science and Management*, *14*(2), 75-91. <https://doi.org/10.1017/inp.2021.16>
30. Pharo, E. J., & Lindenmayer, D. B. (2009). Biological legacies soften pine plantation effects for bryophytes. *Biodiversity and Conservation*, *18*(7), 1751-1764. <https://doi.org/10.1007/s10531-008-9556-4>
31. Pickett, B., Irvine, I. C., Bullock, E., Arogyaswamy, K., & Aronson, E. (2019). Legacy effects of invasive grass impact soil microbes and native shrub growth. *Invasive Plant Science and Management*, *12*(1), 22-35. <https://doi.org/10.1017/inp.2018.32>
32. Rodríguez-Echeverría, S., Afonso, C., Correia, M., Lorenzo, P., & Roiloa, S. R. (2013). The effect of soil legacy on competition and invasion by Acacia dealbata Link. *Plant Ecology*, *214*(9), 1139-1146. <https://doi.org/10.1007/s11258-013-0238-2>
33. Rook, E. J., Fischer, D. G., Seyferth, R. D., Kirsch, J. L., LeRoy, C. J., & Hamman, S. (2011). Responses of prairie vegetation to fire, herbicide, and invasive species legacy. *Northwest Science*, *85*(2), 288-302. <https://doi.org/10.3955/046.085.0216>
34. Rout, M. E., Chrzanowski, T. H., Smith, W. K., & Gough, L. (2013). Ecological impacts of the invasive grass Sorghum halepense on native tallgrass prairie. *Biological invasions*, *15*(2), 327-339. <https://doi.org/10.1007/s10530-012-0289-7>
35. Sample, M., Aslan, C. E., Policelli, N., Sanford, R. L., Nielsen, E., & Nuñez, M. A. (2019). Increase in nonnative understorey vegetation cover after nonnative conifer removal and passive restoration. *Austral Ecology*, *44*(8), 1384-1397. <https://doi.org/10.1111/aec.12812>
36. Shannon, S. M., Bauer, J. T., Anderson, W. E., & Reynolds, H. L. (2014). Plant-soil feedbacks between invasive shrubs and native forest understory species lead to shifts in the abundance of mycorrhizal fungi. *Plant and Soil*, *382*(1), 317-328. <https://doi.org/10.1007/s11104-014-2158-x>
37. Singh, J. P., Kuang, Y., Ploughe, L., Coghill, M., & Fraser, L. H. (2022). Spotted knapweed (Centaurea stoebe) creates a soil legacy effect by modulating soil elemental composition in a semi-arid grassland ecosystem. *Journal of environmental management*, *317*, 115391. <https://doi.org/10.1016/j.jenvman.2022.115391>
38. Slesak, R. A., Harrington, T. B., D’Amato, A. W., & Peter, D. H. (2022). Removal of invasive Scotch broom increases its negative effects on soil chemistry and plant communities. *Oecologia*, *198*(1), 243-254. <https://doi.org/10.1007/s00442-021-05099-z>
39. Stanbury, K. E., Stevens, J. C., & Ritchie, A. L. (2018). Legacy issues in post‐pine (Pinus pinaster) restoration environments: Weeds compromise seedling growth and function more than edaphic factors. *Land Degradation & Development*, *29*(6), 1694-1704. <https://doi.org/10.1002/ldr.2945>
40. Szitár, K., Ónodi, G., Somay, L., Pándi, I., Kucs, P., & Kröel-Dulay, G. (2014). Recovery of inland sand dune grasslands following the removal of alien pine plantation. *Biological Conservation*, *171*, 52-60. <https://doi.org/10.1016/j.biocon.2014.01.021>
41. Unger, I. M., Kremer, R. J., Veum, K. S., & Goyne, K. W. (2022). Immediate and long-term effects of invasive plant species on soil characteristics. *Soil Ecology Letters*, *4*(3), 276-288. <https://doi.org/10.1007/s42832-021-0104-4>
42. Vilà, M., & Gimeno, I. (2007). Does invasion by an alien plant species affect the soil seed bank?. *Journal of Vegetation Science*, *18*(3), 423-430. <https://doi.org/10.1111/j.1654-1103.2007.tb02554.x>
43. Von Holle, B., Neill, C., Largay, E. F., Budreski, K. A., Ozimec, B., Clark, S. A., & Lee, K. (2013). Ecosystem legacy of the introduced N2-fixing tree Robinia pseudoacacia in a coastal forest. *Oecologia*, *172*(3), 915-924. <https://doi.org/10.1007/s00442-012-2543-1>
44. Wei, C., Jia, B., Gao, L., Liu, Z., Liang, Y., Zhang, X., & Lu, X. (2023). Plant growth ability, rather than phylogenetic relatedness, predicts the effect of soil biota from an abandoned field on native and exotic plants. *Journal of Plant Ecology*, *16*(1), rtac044. <https://doi.org/10.1093/jpe/rtac044>
45. Wiener, K. D., Simaika, J. P., Grenfell, S. E., & Jacobs, S. M. (2020). Effects of invasive N2-fixing Acacia mearnsii on sediment nutrient concentrations in mountain streams: implications of sediment geochemistry for ecosystem recovery. *Catena*, *195*, 104786. <https://doi.org/10.1016/j.catena.2020.104786>
46. Zeidler, M., Šipoš, J., Banaš, M., & Černohorský, J. (2022). Homogenization of bryophyte species after alpine grassland restoration. *Journal of environmental management*, *319*, 115628. <https://doi.org/10.1016/j.jenvman.2022.115628>
