# Supplementary material
Source: Research Square preprint supplement (doi:10.21203/rs.3.rs-10244607/v1)
Supplement: Supplementary file 3 [file 41aa7f9b75385c5be3fc31bf.xlsx]

## Sheet: richness_data
id_article	id_obs	author	location	year	inv_sp	plant_or_animal	leg_type	duration	short_or_long_term	response_variable	control_mean	control_SD	control_N	control_VAR	response_mean	response_SD	response_N	response_VAR	lnRR	var_ln
1	1	Gallego	Uruguay (32° 55' S; 54° 26' W)	2023	Pinus taeda	Plant	Biological	84	B	Richness of vegetation	70.7	0.464	5	0.053824	62.07	0.492	5	0.060516	-0.130183	2.11804e-05
1	2	Gallego	Uruguay (32° 55' S; 54° 26' W)	2023	Pinus taeda	Plant	Biological	84	B	Richness of seed bank	60.6	0.5	5	0.0625	72.72	0.462	5	0.053361	0.182322	2.16877e-05
2	3	Zeidler	Keprník Mt (50◦10′ 35.601′′N, 17◦6′ 6.909′′E; 1423 m a.s.l.) in the Jeseníky Mts. (the Czech Republic)	2022	Pinus muga	Plant	Biological	108	B	Species richness	6.99	7.951	10	7.02427	3.947	5.921	20	1.84517	-0.571525	0.241906
2	4	Zeidler	Keprník Mt (50◦10′ 35.601′′N, 17◦6′ 6.909′′E; 1423 m a.s.l.) in the Jeseníky Mts. (the Czech Republic)	2022	Pinus muga	Plant	Biological	108	B	Species diversity	0.7538	0.11209	10	0.00139602	0.6648	0.3033	20	0.00484163	-0.125641	0.0126183
3	5	Slesak	Matlock, Washington (WA) (47.206° N, 123.442° W) and Molalla, Oregon (OR) (45.196° N, 122.285° W) USA	2022	Scotch broom	Plant	Biological	48	A	Native species richness	11.4	0.4	4	0.0533333	5.5	0.4	4	0.0533333	-0.728865	0.0016301
3	6	Slesak	Matlock, Washington (WA) (47.206° N, 123.442° W) and Molalla, Oregon (OR) (45.196° N, 122.285° W) USA	2022	Scotch broom	Plant	Biological	48	A	Native species richness	9.3	0.4	4	0.0533333	8.7	0.4	4	0.0533333	-0.0666914	0.000990953
4	7	Ahmad	Kashmir Himalaya (32◦20′ to 34◦54′ N and 73◦55′ to 75◦35′ E)	2021	Leucanthemum vulgare	Plant	Biological	2	A	Native species richness	11.1	1.89	10	0.3969	11	2.34	10	0.6084	-0.00904984	0.00742449
4	8	Ahmad	Kashmir Himalaya (32◦20′ to 34◦54′ N and 73◦55′ to 75◦35′ E)	2021	Leucanthemum vulgare	Plant	Biological	14	A	Native species richness	11.1	1.89	10	0.3969	11.5	3.26	10	1.18084	0.0354019	0.0109352
4	9	Ahmad	Kashmir Himalaya (32◦20′ to 34◦54′ N and 73◦55′ to 75◦35′ E)	2021	Leucanthemum vulgare	Plant	Biological	26	A	Native species richness	11.1	1.89	10	0.3969	12.6	3.95	10	1.73361	0.126752	0.0127269
5	10	Anthony	New England, USA	2019	Alliaria petiolata	Plant	Biological	12	A	Richness (#OTUS)	183	10	24	4.34783	211	7	24	2.13043	0.142372	0.000170277
5	11	Anthony	New England, USA	2019	Alliaria petiolata	Plant	Biological	36	A	Richness (#OTUS)	88	5	24	1.08696	104	6	24	1.56522	0.167054	0.000273196
6	12	Fuselier	Kentucky Cherokee Park (388140 40.200N, 858410 42.7200W)	2018	Lonicera mackii	Plant	Biological	72	B	No. spp.	2.3	2.94	96	0.0909853	1.3	3.92	96	0.161752	-0.570545	0.111734
7	13	Maclean	Scotland in Argyll, Kintyre and Lochaber, between 55°76′N and 56°90′N,	2017	Rhododendron ponticum	Plant	Biological	120	B	Richness	28.8333	2.85774	6	1.63333	25.3636	3.77552	11	1.42545	-0.128216	0.00365157
7	14	Maclean	Scotland in Argyll, Kintyre and Lochaber, between 55°76′N and 56°90′N,	2017	Rhododendron ponticum	Plant	Biological	180	B	Richness	28.8333	2.85774	6	1.63333	27.3636	6.02117	11	3.62545	-0.0523171	0.00603893
7	15	Maclean	Scotland in Argyll, Kintyre and Lochaber, between 55°76′N and 56°90′N,	2017	Rhododendron ponticum	Plant	Biological	240	B	Richness	28.8333	2.85774	6	1.63333	28.4	3.64692	5	3.325	-0.015143	0.00493516
7	16	Maclean	Scotland in Argyll, Kintyre and Lochaber, between 55°76′N and 56°90′N,	2017	Rhododendron ponticum	Plant	Biological	360	B	Richness	28.8333	2.85774	6	1.63333	24.8	2.28035	5	1.3	-0.150688	0.00332815
8	17	Geddes	Cowles Bog wetland complex (CBWC) at Indiana Dunes National Lakeshore (Porter, IN),	2014	Typha x glauca	Plant	Biological	24	A	Plant species richness	8.7	1	3	0.5	6.35	1	3	0.5	-0.314868	0.0126706
9	18	Szitar	Kiskunság, Hungary.	2014	PInus nigra and Pinus sylvestris	Plant	Biological	60	A	number of species	20.24	80.0895	10	712.704	18.09	60.8093	10	410.864	-0.112302	2.69574
9	19	Szitar	Kiskunság, Hungary.	2014	PInus nigra and Pinus sylvestris	Plant	Biological	60	A	number of species	15.47	65.6263	10	478.535	17.86	60.4382	10	405.864	0.143661	2.94474
10	20	Von Holle	Cape Cod National Seashore (Masachusetts)	2013	Robinia pseudoacacia	Plant	Biological	12	A	native species richness	19.53	2.46658	10	0.676	19.14	4.86991	10	2.63511	-0.0201714	0.00806886
11	21	Hughes	Tutuila Island of American Samoa	2012	Falcataria moluccana	Plant	Biological	132	B	Native Woody sp. richness	25	0.479428	5	0.0574628	32	0.500391	5	0.0625978	0.24686	0.000122457
11	22	Hughes	Tutuila Island of American Samoa	2012	Falcataria moluccana	Plant	Biological	132	B	Total Richness	30	0.496466	5	0.0616197	35	0.503315	5	0.0633314	0.154151	9.61323e-05
11	23	Hughes	Tutuila Island of American Samoa	2012	Falcataria moluccana	Plant	Biological	108	B	Native Woody sp. richness	25	0.479428	5	0.0574628	41	0.498629	5	0.0621577	0.494696	0.000103134
11	24	Hughes	Tutuila Island of American Samoa	2012	Falcataria moluccana	Plant	Biological	108	B	Total Richness	30	0.496466	5	0.0616197	46	0.483693	5	0.0584898	0.427444	7.68864e-05
11	25	Hughes	Tutuila Island of American Samoa	2012	Falcataria moluccana	Plant	Biological	72	B	Native Woody sp. richness	25	0.479428	5	0.0574628	27	0.48752	5	0.059419	0.076961	0.000138758
11	26	Hughes	Tutuila Island of American Samoa	2012	Falcataria moluccana	Plant	Biological	72	B	Total Richness	30	0.496466	5	0.0616197	32	0.500391	5	0.0625978	0.0645385	0.000103678
11	27	Hughes	Tutuila Island of American Samoa	2012	Falcataria moluccana	Plant	Biological	60	A	Native Woody sp. richness	25	0.479428	5	0.0574628	21	0.457719	5	0.0523768	-0.174353	0.000168567
11	28	Hughes	Tutuila Island of American Samoa	2012	Falcataria moluccana	Plant	Biological	60	A	Total Richness	30	0.496466	5	0.0616197	23	0.469533	5	0.0551154	-0.265703	0.000138123
12	29	Rook	-	2011	Cytisus scoparius	Plant	Biological	48	A	Native richness	6.015	2.405	20	0.304422	9.17	2.4	20	0.303158	0.421681	0.0114183
12	30	Rook	-	2011	Cytisus scoparius	Plant	Biological	12	A	Native richness	6.015	2.405	20	0.304422	6.31	1.81	20	0.172426	0.0478793	0.0121074
12	31	Rook	-	2011	Cytisus scoparius	Plant	Biological	48	A	Total Richness	9.47	2.71	20	0.386532	10.68	2.55	20	0.342237	0.120244	0.00694499
12	32	Rook	-	2011	Cytisus scoparius	Plant	Biological	12	A	Total Richness	9.47	2.71	20	0.386532	10.67	2.26	20	0.268821	0.119307	0.00633772
12	33	Rook	-	2011	Cytisus scoparius	Plant	Biological	48	A	Shannon´s H NATIVES	1.13	0.35	20	0.00644737	1.39	0.3	20	0.00473684	0.207086	0.00712585
12	34	Rook	-	2011	Cytisus scoparius	Plant	Biological	12	A	Shannon´s H NATIVES	1.13	0.35	20	0.00644737	1.13	0.3	20	0.00473684	0	0.00832093
12	35	Rook	-	2011	Cytisus scoparius	Plant	Biological	48	A	Shannon´s H Total	1.72	0.33	20	0.00573158	1.8	0.32	20	0.00538947	0.0454624	0.00342077
12	36	Rook	-	2011	Cytisus scoparius	Plant	Biological	12	A	Shannon´s H Total	1.72	0.33	20	0.00573158	1.62	0.25	20	0.00328947	-0.0598981	0.00303127
13	37	Pharo	New South Wales (south-eastern Australia)	2009	Pinus radiata	Plant	Biological	180	B	Species richness of bryophytes	5.56	2.14663	5	1.152	6.08	2.27684	10	0.576	0.0894066	0.0438357
13	38	Pharo	New South Wales (south-eastern Australia)	2009	Pinus radiata	Plant	Biological	180	B	Species richness of bryophytes	5.56	2.14663	5	1.152	5.18	1.32816	10	0.196	-0.0707931	0.0363863
13	39	Pharo	New South Wales (south-eastern Australia)	2009	Pinus radiata	Plant	Biological	180	B	Species richness of bryophytes	1.58	0.424853	5	0.045125	0.96	0.885438	10	0.0871111	-0.498247	0.0995303
13	40	Pharo	New South Wales (south-eastern Australia)	2009	Pinus radiata	Plant	Biological	180	B	Species richness of bryophytes	1.58	0.424853	5	0.045125	1.2	1.26491	10	0.177778	-0.275103	0.125572
13	41	Pharo	New South Wales (south-eastern Australia)	2009	Pinus radiata	Plant	Biological	180	B	Species richness of bryophytes	2.2	0.31305	5	0.0245	2.2	1.07517	10	0.128444	0	0.0279339
13	42	Pharo	New South Wales (south-eastern Australia)	2009	Pinus radiata	Plant	Biological	180	B	Species richness of bryophytes	2.2	0.31305	5	0.0245	1.97	0.727324	10	0.0587778	-0.110424	0.0176804
13	43	Pharo	New South Wales (south-eastern Australia)	2009	Pinus radiata	Plant	Biological	180	B	Species richness of bryophytes	2.5	1.16276	5	0.338	3.02	2.15035	10	0.513778	0.188966	0.0939635
13	44	Pharo	New South Wales (south-eastern Australia)	2009	Pinus radiata	Plant	Biological	180	B	Species richness of bryophytes	2.5	1.16276	5	0.338	2.6	1.48627	10	0.245444	0.0392207	0.0759415
14	45	Vila	Menorca, Balearic Islands (40o05'39" and 38o38'25" N and 1o11'16" and 4o19'38" E).	2007	Oxalis pes-caprae	Plant	Biological	12	A	Species/tray	17.52	4.38406	8	2.74571	18.3	5.09117	8	3.70286	0.043558	0.0175018

## Sheet: richness_metadata
Variable	Description
id_article	Internal observation id
id_obs	Internal article id
author	First auhor
location	Site of the study
year	Year of publication
inv_sp	Invasive species
plant_or_animal	Type of invasive species
leg_type	Type of legacy
duration	Duration of the legacy (in months)
short_or_long_term	Duration of the legacy: short-term:< 5 years ("A"); long-term: > 5 years ("B")
response_variable	Response associated with richness
control_mean	Control (uninvaded) mean
control_SD	Control (uninvaded) standard deviation
control_N	Control (uninvaded) sample size
control_VAR	Control (uninvaded) variance
response_mean	Response (after invasion) mean
response_SD	Response (after invasion) standard deviation
response_N	Response (after invasion) sample size
response_VAR	Response (after invasion) variance
lnRR	Effect size (expressed as ln-Response-Ratio)
var_ln	Variance of the effect size
