# Supplementary material
Source: Research Square preprint supplement (doi:10.21203/rs.3.rs-10244607/v1)
Supplement: Supplementary file 4 [file 481285fb0cc8457652346638.xlsx]

## Sheet: nutrients_data
id_article	id_obs	author	location	year	inv_sp	plant_or_animal	leg_type	duration	short_or_long_term	response_variable	control_mean	control_SD	control_N	control_VAR	response_mean	response_SD	response_N	response_VAR	lnRR	var_ln
1	1	Afzal	Xianglushan (119◦13′41′′ E, 32◦07′42.9′′ N) around Zhenjiang in Jiangsu Province, China.	2024	Solidago canadensis	Plant	Biogeochem	1	A	N content	3.33	0.11	5	0.003025	3.17	0.108	5	0.002916	-0.0492407	0.000450381
1	2	Afzal	Xianglushan (119◦13′41′′ E, 32◦07′42.9′′ N) around Zhenjiang in Jiangsu Province, China.	2024	Sorghum bicolor	Plant	Biogeochem	1	A	N content	3.33	0.11	5	0.003025	2.9	0.54	5	0.0729	-0.138262	0.00715284
1	3	Afzal	Xianglushan (119◦13′41′′ E, 32◦07′42.9′′ N) around Zhenjiang in Jiangsu Province, China.	2024	Solidago canadensis	Plant	Biogeochem	1	A	N content	3.7	0.28	5	0.0196	3.49	0.38	5	0.0361	-0.0584311	0.00351644
1	4	Afzal	Xianglushan (119◦13′41′′ E, 32◦07′42.9′′ N) around Zhenjiang in Jiangsu Province, China.	2024	Sorghum bicolor	Plant	Biogeochem	1	A	N content	3.7	0.28	5	0.0196	3.172	0.268	5	0.017956	-0.153971	0.00257305
1	5	Afzal	Xianglushan (119◦13′41′′ E, 32◦07′42.9′′ N) around Zhenjiang in Jiangsu Province, China.	2024	Solidago canadensis	Plant	Biogeochem	1	A	N content	3.33	0.16	5	0.0064	3.06	0.06	5	0.0009	-0.0845574	0.000538616
1	6	Afzal	Xianglushan (119◦13′41′′ E, 32◦07′42.9′′ N) around Zhenjiang in Jiangsu Province, China.	2024	Sorghum bicolor	Plant	Biogeochem	1	A	N content	3.33	0.16	5	0.0064	3.06	0.22	5	0.0121	-0.0845574	0.00149551
1	7	Afzal	Xianglushan (119◦13′41′′ E, 32◦07′42.9′′ N) around Zhenjiang in Jiangsu Province, China.	2024	Solidago canadensis	Plant	Biogeochem	1	A	N content	3.44	0.11	5	0.003025	3.12	0.16	5	0.0064	-0.0976385	0.000730472
1	8	Afzal	Xianglushan (119◦13′41′′ E, 32◦07′42.9′′ N) around Zhenjiang in Jiangsu Province, China.	2024	Sorghum bicolor	Plant	Biogeochem	1	A	N content	3.44	0.11	5	0.003025	3.28	0.21	5	0.011025	-0.047628	0.00102433
2	9	Singh	Lac Du Bios Grasslands Protected Area, located northwest of Kamloops, British Columbia, Canada (N50◦47′ , W120◦26′ )	2022	spotted knapweed (Centaurea stoebe)	Plant	Biogeochem	4	A	%N	0.7641	0.49528	40	0.0062898	0.7075	0.45286	40	0.00525852	-0.076961	0.0207464
3	10	Slesak	Matlock, Washington (WA) (47.206° N, 123.442° W) and Molalla, Oregon (OR) (45.196° N, 122.285° W) USA	2022	Scotch broom	Plant	Biogeochem	48	A	%N	0.25	0.06	3	0.0018	0.27	0.07	3	0.00245	0.076961	0.0416051
3	11	Slesak	Matlock, Washington (WA) (47.206° N, 123.442° W) and Molalla, Oregon (OR) (45.196° N, 122.285° W) USA	2022	Scotch broom	Plant	Biogeochem	48	A	%N	0.3	0.08	3	0.0032	0.6	0.1	3	0.005	0.693147	0.032963
4	12	Connell	Konza Prairie Biological Station Manhattan Kansas USA 39° 5′ 35″ N, 96° 33′ 31″ W	2021	Bromus inermis	Plant	Biogeochem	10.27	A	total N	2.47	0.348569	60	0.00205932	2.78	0.503488	60	0.00429661	0.118233	0.000878603
5	13	Unger	Missouri, Tucker Prairie Natural Area (38.9485° N, 91.9943° W)	2021	Lespedeza cuneata	Plant	Biogeochem	24	A	% total N	0.2	0.0334	4	0.000371853	0.15	0.02	4	0.000133333	-0.287682	0.0114167
5	14	Unger	Missouri, Tucker Prairie Natural Area (38.9485° N, 91.9943° W)	2021	Lespedeza cuneata	Plant	Biogeochem	48	A	% total N	0.2	0.0334	4	0.000371853	0.153	0.0167	4	9.29633e-05	-0.267879	0.0099507
6	15	Parsons	Point Reyes National Seashore (PRNS), California	2021	Ammophila arenaria	Plant	Biogeochem	48	A	Total Kjieldahl N	175.5	149.4	99	227.759	403.7	422.8	99	1824.08	0.833033	0.0183994
6	16	Parsons	Point Reyes National Seashore (PRNS), California	2021	Ammophila arenaria	Plant	Biogeochem	48	A	Total Kjieldahl N	175.5	149.4	99	227.759	165.1	138.5	99	195.737	-0.0610877	0.0144284
6	17	Parsons	Point Reyes National Seashore (PRNS), California	2021	Ammophila arenaria	Plant	Biogeochem	48	A	Total Kjieldahl N	725	615.2	99	3861.95	403.7	422.8	99	1824.08	-0.5855	0.0183526
6	18	Parsons	Point Reyes National Seashore (PRNS), California	2021	Ammophila arenaria	Plant	Biogeochem	48	A	Total Kjieldahl N	725	615.2	99	3861.95	165.1	138.5	99	195.737	-1.47962	0.0143815
7	19	Ahmad	Kashmir Himalaya (32◦20′ to 34◦54′ N and 73◦55′ to 75◦35′ E)	2021	Leucanthemum vulgare	Plant	Biogeochem	2	A	% total N	0.26	0.12	10	0.0016	0.47	0.18	10	0.0036	0.592051	0.035969
8	20	Wiener	Cape Floristic Region, South Africa	2020	Acacia mearnsii	Plant	Biogeochem	120	B	Total N	0.77	0.37	54	0.00258302	0.78	0.3	54	0.00169811	0.0129034	0.00701533
8	21	Wiener	Cape Floristic Region, South Africa	2020	Acacia mearnsii	Plant	Biogeochem	120	B	Total N	0.56	0.15	54	0.000424528	0.51	0.22	54	0.000913208	-0.0935261	0.00477462
9	22	Anthony	New England, USA	2019	Alliaria petiolata	Plant	Biogeochem	12	A	NH4	21.6	3.5	24	0.532609	22.5	5.2	24	1.17565	0.040822	0.00331951
9	23	Anthony	New England, USA	2019	Alliaria petiolata	Plant	Biogeochem	12	A	NO3	66	18.1	24	14.2439	185.9	35.7	24	55.4126	1.03555	0.00467032
9	24	Anthony	New England, USA	2019	Alliaria petiolata	Plant	Biogeochem	36	A	NH4	8.3	1	24	0.0434783	10.9	1	24	0.0434783	0.272507	0.000955529
9	25	Anthony	New England, USA	2019	Alliaria petiolata	Plant	Biogeochem	36	A	NO3	0.3	0.1	24	0.000434783	0.7	0.1	24	0.000434783	0.847298	0.00547997
10	26	Carter	Matlock, WA, USA, (47.215N, 123.417W)	2019	Scotch broom	Plant	Biogeochem	36	A	%N	0.06	0.02	60	6.77966e-06	0.06	0.02	60	6.77966e-06	0	0.0037037
11	27	Pickett	Rancho Sierra Vista (RSV), a park unit of the Santa Monica Mountains National Recreation Area. (34.09° N 118.57° W)	2019	Phalaris aquatica	Plant	Biogeochem	132	B	NH4	1.23	1.29	30	0.0573828	2	1.966	30	0.133281	0.486133	0.0688743
11	28	Pickett	Rancho Sierra Vista (RSV), a park unit of the Santa Monica Mountains National Recreation Area. (34.09° N 118.57° W)	2019	Phalaris aquatica	Plant	Biogeochem	132	B	NO3	1.4	0.506	30	0.00882883	4.157	0.674	30	0.0156647	1.08832	0.00523062
11	29	Pickett	Rancho Sierra Vista (RSV), a park unit of the Santa Monica Mountains National Recreation Area. (34.09° N 118.57° W)	2019	Phalaris aquatica	Plant	Biogeochem	132	B	%N	0.197	0.078	30	0.000209793	0.237	0.079	30	0.000215207	0.184856	0.0089293
12	30	Stanbury	south-west of Western Australia	2018	Pinus pinaster	Plant	Biogeochem	12	A	NH4	2.8	4.10122	50	0.343265	3	5.44472	50	0.605	0.0689929	0.108786
12	31	Stanbury	south-west of Western Australia	2018	Pinus pinaster	Plant	Biogeochem	60	A	NH4	2.8	4.10122	50	0.343265	2.3	1.55563	50	0.0493878	-0.19671	0.0520575
12	32	Stanbury	south-west of Western Australia	2018	Pinus pinaster	Plant	Biogeochem	84	B	NH4	2.8	4.10122	50	0.343265	2.2	4.10122	50	0.343265	-0.241162	0.112412
13	33	Maclean	Scotland in Argyll, Kintyre and Lochaber, between 55°76′N and 56°90′N,	2017	Rhododendron ponticum	Plant	Biogeochem	120	B	%N	0.830257	0.13291	6	0.003533	1.34313	0.230257	11	0.00530183	0.481021	0.00694284
13	34	Maclean	Scotland in Argyll, Kintyre and Lochaber, between 55°76′N and 56°90′N,	2017	Rhododendron ponticum	Plant	Biogeochem	180	B	%N	0.830257	0.13291	6	0.003533	1.09773	0.46555	11	0.0216737	0.279267	0.0206221
13	35	Maclean	Scotland in Argyll, Kintyre and Lochaber, between 55°76′N and 56°90′N,	2017	Rhododendron ponticum	Plant	Biogeochem	240	B	%N	0.830257	0.13291	6	0.003533	1.41574	0.208005	5	0.0108166	0.533675	0.00858835
13	36	Maclean	Scotland in Argyll, Kintyre and Lochaber, between 55°76′N and 56°90′N,	2017	Rhododendron ponticum	Plant	Biogeochem	360	B	%N	0.830257	0.13291	6	0.003533	0.910401	0.284888	5	0.0202903	0.0921492	0.0238556
14	37	Nsikani	Cape Flats Sand Fynbos (CFSF) of the Western Cape Province, South Africa	2017	Acacia saligna	Plant	Biogeochem	24	A	NO3	7.49	1.77	45	0.0712023	11.9	3.53	45	0.283202	0.46297	0.00319643
14	38	Nsikani	Cape Flats Sand Fynbos (CFSF) of the Western Cape Province, South Africa	2017	Acacia saligna	Plant	Biogeochem	72	B	NO4	0.88	0.59	45	0.00791136	2.94	0.58	45	0.00764545	1.20624	0.010854
14	39	Nsikani	Cape Flats Sand Fynbos (CFSF) of the Western Cape Province, South Africa	2017	Acacia saligna	Plant	Biogeochem	120	B	NO5	0.88	0.59	45	0.00791136	3.38	1.47	45	0.0491114	1.34571	0.0141924
14	40	Nsikani	Cape Flats Sand Fynbos (CFSF) of the Western Cape Province, South Africa	2017	Acacia saligna	Plant	Biogeochem	24	A	%N	0.09	0.04	45	3.63636e-05	0.119	0.04	45	3.63636e-05	0.279314	0.00690038
14	41	Nsikani	Cape Flats Sand Fynbos (CFSF) of the Western Cape Province, South Africa	2017	Acacia saligna	Plant	Biogeochem	72	B	%N	0.09	0.04	45	3.63636e-05	0.009	0	45	0	-2.30259	0.00438957
14	42	Nsikani	Cape Flats Sand Fynbos (CFSF) of the Western Cape Province, South Africa	2017	Acacia saligna	Plant	Biogeochem	120	B	%N	0.089	0.04	45	3.63636e-05	0.1	0.021	45	1.00227e-05	0.116534	0.00546877
14	43	Nsikani	Cape Flats Sand Fynbos (CFSF) of the Western Cape Province, South Africa	2017	Acacia saligna	Plant	Biogeochem	24	A	NH4	7.54	2.03	45	0.0936568	6.16	0.55	45	0.006875	-0.202145	0.00178794
14	44	Nsikani	Cape Flats Sand Fynbos (CFSF) of the Western Cape Province, South Africa	2017	Acacia saligna	Plant	Biogeochem	72	B	NH5	5.15	0.95	45	0.0205114	5.52	1.01	45	0.0231841	0.0693811	0.00150014
14	45	Nsikani	Cape Flats Sand Fynbos (CFSF) of the Western Cape Province, South Africa	2017	Acacia saligna	Plant	Biogeochem	120	B	NH6	5.15	0.95	45	0.0205114	5.88	0.91	45	0.0188205	0.13256	0.00128842
15	46	Broadbent	St. James Conservation Area in the South Island of New Zealand (Lat. Long. = -42.460273, 172.830938; elevation = 800– 900 m.a.s.l)	2017	Cytisus scoparius	Plant	Biogeochem	72	B	Inorganic N	0.4	0.6	4	0.12	33.7	36	4	432	4.43379	0.847789
16	47	Geddes	Cowles Bog wetland complex (CBWC) at Indiana Dunes National Lakeshore (Porter, IN),	2014	Typha x glauca	Plant	Biogeochem	24	A	Soil nitrates	0.012	0.017	3	0.0001445	0.036	0.024	3	0.000288	1.09861	0.81713
16	48	Geddes	Cowles Bog wetland complex (CBWC) at Indiana Dunes National Lakeshore (Porter, IN),	2014	Typha x glauca	Plant	Biogeochem	24	A	soil ammonium	0.0075	0.0081	3	3.2805e-05	0.022	0.009	3	4.05e-05	1.07614	0.444585
17	49	Szitar	Kiskunság, Hungary.	2014	Pinus nigra and Pinus sylvestris	Plant	Biogeochem	60	A	nitrates	0.99	0.537587	10	0.0321111	0.79	0.252982	10	0.00711111	-0.225672	0.0397416
17	50	Szitar	Kiskunság, Hungary.	2014	Pinus nigra and Pinus sylvestris	Plant	Biogeochem	60	A	nitrates	0.89	0.632456	10	0.0444444	1.02	0.411096	10	0.0187778	0.136336	0.0667424
17	51	Szitar	Kiskunság, Hungary.	2014	Pinus nigra and Pinus sylvestris	Plant	Biogeochem	60	A	ammonium	4.7	0.948683	10	0.1	4.3	0.632456	10	0.0444444	-0.0889475	0.00623757
17	52	Szitar	Kiskunság, Hungary.	2014	Pinus nigra and Pinus sylvestris	Plant	Biogeochem	60	A	ammonium	4.7	1.26491	10	0.177778	4.4	0.316228	10	0.0111111	-0.065958	0.00775963
18	53	Dickie	Craigieburn Forest Park, Canterbury, New Zealand (4389′ 04′′S, 171843′ 52′′E)	2014	Pinus contorta	Plant	Biogeochem	36	A	%total N	0.35	0.014	6	3.92e-05	0.33	0.029	5	0.00021025	-0.0588405	0.0018112
18	54	Dickie	Craigieburn Forest Park, Canterbury, New Zealand (4389′ 04′′S, 171843′ 52′′E)	2014	Pinus contorta	Plant	Biogeochem	36	A	ammonium	13	3.1	6	1.922	19	7	5	12.25	0.37949	0.0366241
18	55	Dickie	Craigieburn Forest Park, Canterbury, New Zealand (4389′ 04′′S, 171843′ 52′′E)	2014	Pinus contorta	Plant	Biogeochem	36	A	nitrates	0.34	0.03	6	0.00018	5.8	4.5	5	5.0625	2.83667	0.12169
19	56	Hagan	Croom Tract of Withlacoochee State Forest in Hernando County, Florida (28°36´19.99´´N, 82°16´19.73´´W).	2013	Imperata cylindrica	Plant	Biogeochem	36	A	Total N	1064	166.277	12	2513.45	936	151.789	10	2560	-0.128175	0.00466501
19	57	Hagan	Croom Tract of Withlacoochee State Forest in Hernando County, Florida (28°36´19.99´´N, 82°16´19.73´´W).	2013	Imperata cylindrica	Plant	Biogeochem	60	A	Total N	1064	166.277	12	2513.45	960	145.931	11	2129.6	-0.102857	0.00413586
19	58	Hagan	Croom Tract of Withlacoochee State Forest in Hernando County, Florida (28°36´19.99´´N, 82°16´19.73´´W).	2013	Imperata cylindrica	Plant	Biogeochem	84	B	Total N	1064	166.277	12	2513.45	972	152.42	12	2112	-0.0904349	0.00408431
19	59	Hagan	Croom Tract of Withlacoochee State Forest in Hernando County, Florida (28°36´19.99´´N, 82°16´19.73´´W).	2013	Imperata cylindrica	Plant	Biogeochem	36	A	Ammonium	0.019	0.0173205	12	2.72727e-05	0.02	0.013914	10	2.15111e-05	0.0512933	0.117652
19	60	Hagan	Croom Tract of Withlacoochee State Forest in Hernando County, Florida (28°36´19.99´´N, 82°16´19.73´´W).	2013	Imperata cylindrica	Plant	Biogeochem	60	A	Ammonium	0.019	0.0173205	12	2.72727e-05	0.018	0.0165831	11	2.75e-05	-0.0540672	0.146413
19	61	Hagan	Croom Tract of Withlacoochee State Forest in Hernando County, Florida (28°36´19.99´´N, 82°16´19.73´´W).	2013	Imperata cylindrica	Plant	Biogeochem	84	B	Ammonium	0.019	0.0173205	12	2.72727e-05	0.023	0.0173205	12	2.72727e-05	0.191055	0.116511
19	62	Hagan	Croom Tract of Withlacoochee State Forest in Hernando County, Florida (28°36´19.99´´N, 82°16´19.73´´W).	2013	Imperata cylindrica	Plant	Biogeochem	36	A	Nitrates	0.0088	0.0225167	12	4.60909e-05	0.051	0.0189737	10	4e-05	1.75707	0.559425
19	63	Hagan	Croom Tract of Withlacoochee State Forest in Hernando County, Florida (28°36´19.99´´N, 82°16´19.73´´W).	2013	Imperata cylindrica	Plant	Biogeochem	60	A	Nitrates	0.0088	0.0225167	12	4.60909e-05	0.028	0.0198997	11	3.96e-05	1.15745	0.591502
19	64	Hagan	Croom Tract of Withlacoochee State Forest in Hernando County, Florida (28°36´19.99´´N, 82°16´19.73´´W).	2013	Imperata cylindrica	Plant	Biogeochem	84	B	Nitrates	0.0088	0.0225167	12	4.60909e-05	0.02	0.0242487	12	5.34545e-05	0.820981	0.668084
20	65	Von Holle	Cape Cod National Seashore (Masachusetts)	2013	Robinia pseudoacacia	Plant	Biogeochem	240	B	Nitrate	0.021	0.13914	40	0.00049641	0.47	0.695701	40	0.0124103	3.10821	1.15228
20	66	Von Holle	Cape Cod National Seashore (Masachusetts)	2013	Robinia pseudoacacia	Plant	Biogeochem	240	B	ammonium	1.86	1.32816	40	0.0452308	3.52	3.79473	40	0.369231	0.637885	0.0418019
21	67	Grove	Washington	2012	Cytisus scoparius	Plant	Biogeochem	360	B	Total %N	0.454	2.91849	14	0.6552	0.785	0.0748331	14	0.000430769	0.547587	2.95239
21	68	Grove	Washington	2012	Cytisus scoparius	Plant	Biogeochem	360	B	Total %N	0.523	10.6637	14	8.74731	0.365	6.21115	14	2.96757	-0.359684	50.379
21	69	Grove	Washington	2012	Cytisus scoparius	Plant	Biogeochem	360	B	Nitrates	7.14	5.98665	14	2.75692	10.29	5.02505	14	1.94239	0.36546	0.0672503
21	70	Grove	Washington	2012	Cytisus scoparius	Plant	Biogeochem	360	B	Nitrates	11.07	6.02407	14	2.79149	7.03	8.53098	14	5.59828	-0.454052	0.126339
22	71	Jordan	North Dakota and Montana	2011	Bromus, Agropyron and Euphorbia	Plant	Biogeochem	3	A	Nitrate	3.6	0.47	4	0.0736333	4.6	1.39	4	0.644033	-9.19822	0.0228273
22	72	Jordan	North Dakota and Montana	2011	Bromus, Agropyron and Euphorbia	Plant	Biogeochem	3	A	Nitrate	3.8	0.21	4	0.0147	3.5	0.67	4	0.149633	-0.0822381	0.00992473
22	73	Jordan	North Dakota and Montana	2011	Bromus, Agropyron and Euphorbia	Plant	Biogeochem	3	A	Nitrate	3.4	0.24	4	0.0192	4.1	0.66	4	0.1452	0.187212	0.00772396
22	74	Jordan	North Dakota and Montana	2011	Bromus, Agropyron and Euphorbia	Plant	Biogeochem	3	A	Nitrate	3	0.31	4	0.0320333	3.1	0.32	4	0.0341333	0.0327898	0.00533334
22	75	Jordan	North Dakota and Montana	2011	Bromus, Agropyron and Euphorbia	Plant	Biogeochem	3	A	Nitrate	3.3	0.26	4	0.0225333	3.1	0.3	4	0.03	-0.0625204	0.00389319
22	76	Jordan	North Dakota and Montana	2011	Bromus, Agropyron and Euphorbia	Plant	Biogeochem	3	A	Nitrate	3.5	0.3	4	0.03	3.6	0.18	4	0.0108	0.0281709	0.00246173
22	77	Jordan	North Dakota and Montana	2011	Bromus, Agropyron and Euphorbia	Plant	Biogeochem	3	A	Ammonium	2.8	0.16	4	0.00853333	3	0.66	4	0.1452	0.0689929	0.0129163
22	78	Jordan	North Dakota and Montana	2011	Bromus, Agropyron and Euphorbia	Plant	Biogeochem	3	A	Ammonium	2.3	0.06	4	0.0012	2.1	0.05	4	0.000833333	-0.0909718	0.000311856
22	79	Jordan	North Dakota and Montana	2011	Bromus, Agropyron and Euphorbia	Plant	Biogeochem	3	A	Ammonium	2.6	0.21	4	0.0147	2.4	0.19	4	0.0120333	-0.0800427	0.00319776
22	80	Jordan	North Dakota and Montana	2011	Bromus, Agropyron and Euphorbia	Plant	Biogeochem	3	A	Ammonium	2	0.1	4	0.00333333	1.9	0.42	4	0.0588	-0.0512933	0.0128411
22	81	Jordan	North Dakota and Montana	2011	Bromus, Agropyron and Euphorbia	Plant	Biogeochem	3	A	Ammonium	2.6	0.41	4	0.0560333	2.7	0.13	4	0.00563333	0.0377403	0.00679628
22	82	Jordan	North Dakota and Montana	2011	Bromus, Agropyron and Euphorbia	Plant	Biogeochem	3	A	Ammonium	2	0.23	4	0.0176333	1.8	0.07	4	0.00163333	-0.105361	0.00368434

## Sheet: nutrients_metadata
Variable	Description
id_article	Internal observation id
id_obs	Internal article id
author	First auhor
location	Site of the study
year	Year of publication
inv_sp	Invasive species
plant_or_animal	Type of invasive species
leg_type	Type of legacy
duration	Duration of the legacy (in months)
short_or_long_term	Duration of the legacy: short-term:< 5 years ("A"); long-term: > 5 years ("B")
response_variable	Response associated with nutrients
control_mean	Control (uninvaded) mean
control_SD	Control (uninvaded) standard deviation
control_N	Control (uninvaded) sample size
control_VAR	Control (uninvaded) variance
response_mean	Response (after invasion) mean
response_SD	Response (after invasion) standard deviation
response_N	Response (after invasion) sample size
response_VAR	Response (after invasion) variance
lnRR	Effect size (expressed as ln-Response-Ratio)
var_ln	Variance of the effect size
