# Supplementary material
Source: Research Square preprint supplement (doi:10.21203/rs.3.rs-10244607/v1)
Supplement: Supplementary file 5 [file bc1a1b4f6df8f603f22b1bf1.xlsx]

## Sheet: plantperformance_data
id_article	id_obs	author	location	year	inv_sp	plant_or_animal	leg_type	duration	short_or_long_term	response_variable	control_mean	control_SD	control_N	control_VAR	response_mean	response_SD	response_N	response_VAR	lnRR	var_ln
1	1	Afzal	Xianglushan (119◦13′41′′ E, 32◦07′42.9′′ N) around Zhenjiang in Jiangsu Province, China.	2024	Solidago canadensis	Plant	Biological	1	A	Lenght of longest leaf	2.84	0.1	5	0.0025	1.97	0.19	5	0.009025	-0.365771	0.00210836
1	2	Afzal	Xianglushan (119◦13′41′′ E, 32◦07′42.9′′ N) around Zhenjiang in Jiangsu Province, China.	2024	Sorghum bicolor	Plant	Biological	1	A	Lenght of longest leaf	2.84	0.1	5	0.0025	1.75	0.22	5	0.0121	-0.484188	0.00340878
1	3	Afzal	Xianglushan (119◦13′41′′ E, 32◦07′42.9′′ N) around Zhenjiang in Jiangsu Province, China.	2024	Solidago canadensis	Plant	Biological	1	A	Lenght of longest leaf	22.97	3.72	5	3.4596	24.94	2.84	5	2.0164	0.0822839	0.00783901
1	4	Afzal	Xianglushan (119◦13′41′′ E, 32◦07′42.9′′ N) around Zhenjiang in Jiangsu Province, China.	2024	Sorghum bicolor	Plant	Biological	1	A	Lenght of longest leaf	22.97	3.72	5	3.4596	29.09	1.75	5	0.765625	0.236205	0.00596938
1	5	Afzal	Xianglushan (119◦13′41′′ E, 32◦07′42.9′′ N) around Zhenjiang in Jiangsu Province, China.	2024	Solidago canadensis	Plant	Biological	1	A	Lenght of longest leaf	18.8	0.89	5	0.198025	14.875	2.84	5	2.0164	-0.234175	0.00773865
1	6	Afzal	Xianglushan (119◦13′41′′ E, 32◦07′42.9′′ N) around Zhenjiang in Jiangsu Province, China.	2024	Sorghum bicolor	Plant	Biological	1	A	Lenght of longest leaf	18.8	0.89	5	0.198025	17.28	2.41	5	1.45203	-0.0843071	0.00433847
1	7	Afzal	Xianglushan (119◦13′41′′ E, 32◦07′42.9′′ N) around Zhenjiang in Jiangsu Province, China.	2024	Solidago canadensis	Plant	Biological	1	A	Lenght of longest leaf	10.28	1.751	5	0.7665	7.875	1.095	5	0.299756	-0.266507	0.00966936
1	8	Afzal	Xianglushan (119◦13′41′′ E, 32◦07′42.9′′ N) around Zhenjiang in Jiangsu Province, China.	2024	Sorghum bicolor	Plant	Biological	1	A	Lenght of longest leaf	10.28	1.751	5	0.7665	8.75	1.75	5	0.765625	-0.161147	0.0138025
1	9	Afzal	Xianglushan (119◦13′41′′ E, 32◦07′42.9′′ N) around Zhenjiang in Jiangsu Province, China.	2024	Solidago canadensis	Plant	Biological	1	A	Shoot lenght	34.375	3.125	5	2.44141	32.5	2.5	5	1.5625	-0.0560895	0.00283632
1	10	Afzal	Xianglushan (119◦13′41′′ E, 32◦07′42.9′′ N) around Zhenjiang in Jiangsu Province, China.	2024	Sorghum bicolor	Plant	Biological	1	A	Shoot lenght	34.375	3.125	5	2.44141	30	4.375	5	4.78516	-0.136132	0.00590636
1	11	Afzal	Xianglushan (119◦13′41′′ E, 32◦07′42.9′′ N) around Zhenjiang in Jiangsu Province, China.	2024	Solidago canadensis	Plant	Biological	1	A	Shoot lenght	59.375	5.625	5	7.91016	66.875	1.25	5	0.390625	0.118952	0.00186489
1	12	Afzal	Xianglushan (119◦13′41′′ E, 32◦07′42.9′′ N) around Zhenjiang in Jiangsu Province, China.	2024	Sorghum bicolor	Plant	Biological	1	A	Shoot lenght	59.375	5.625	5	7.91016	70	6.25	5	9.76562	0.164622	0.0033894
1	13	Afzal	Xianglushan (119◦13′41′′ E, 32◦07′42.9′′ N) around Zhenjiang in Jiangsu Province, China.	2024	Solidago canadensis	Plant	Biological	1	A	Shoot lenght	69.375	5.625	5	7.91016	61.875	7.5	5	14.0625	-0.11441	0.0042533
1	14	Afzal	Xianglushan (119◦13′41′′ E, 32◦07′42.9′′ N) around Zhenjiang in Jiangsu Province, China.	2024	Sorghum bicolor	Plant	Biological	1	A	Shoot lenght	69.375	5.625	5	7.91016	68.125	4.375	5	4.78516	-0.0181823	0.00213967
1	15	Afzal	Xianglushan (119◦13′41′′ E, 32◦07′42.9′′ N) around Zhenjiang in Jiangsu Province, China.	2024	Solidago canadensis	Plant	Biological	1	A	Shoot lenght	74.375	8.125	5	16.5039	56.875	8.125	5	16.5039	-0.268264	0.00646847
1	16	Afzal	Xianglushan (119◦13′41′′ E, 32◦07′42.9′′ N) around Zhenjiang in Jiangsu Province, China.	2024	Sorghum bicolor	Plant	Biological	1	A	Shoot lenght	74.375	8.125	5	16.5039	60	7.5	5	14.0625	-0.214775	0.00551184
1	17	Afzal	Xianglushan (119◦13′41′′ E, 32◦07′42.9′′ N) around Zhenjiang in Jiangsu Province, China.	2024	Solidago canadensis	Plant	Biological	1	A	Shoot biomass	21.66	4.81	5	5.78402	13.56	3.5	5	3.0625	-0.468343	0.0231872
1	18	Afzal	Xianglushan (119◦13′41′′ E, 32◦07′42.9′′ N) around Zhenjiang in Jiangsu Province, China.	2024	Sorghum bicolor	Plant	Biological	1	A	Shoot biomass	21.66	4.81	5	5.78402	9.625	2.625	5	1.72266	-0.811103	0.0247389
1	19	Afzal	Xianglushan (119◦13′41′′ E, 32◦07′42.9′′ N) around Zhenjiang in Jiangsu Province, China.	2024	Solidago canadensis	Plant	Biological	1	A	Shoot biomass	12.6875	1.093	5	0.298662	13.78	1.97	5	0.970225	0.082601	0.00557185
1	20	Afzal	Xianglushan (119◦13′41′′ E, 32◦07′42.9′′ N) around Zhenjiang in Jiangsu Province, China.	2024	Sorghum bicolor	Plant	Biological	1	A	Shoot biomass	12.6875	1.093	5	0.298662	15.75	1.75	5	0.765625	0.216223	0.00395342
1	21	Afzal	Xianglushan (119◦13′41′′ E, 32◦07′42.9′′ N) around Zhenjiang in Jiangsu Province, China.	2024	Solidago canadensis	Plant	Biological	1	A	Shoot biomass	25.156	3.72	5	3.4596	20.78	3.5	5	3.0625	-0.191105	0.0100473
1	22	Afzal	Xianglushan (119◦13′41′′ E, 32◦07′42.9′′ N) around Zhenjiang in Jiangsu Province, China.	2024	Sorghum bicolor	Plant	Biological	1	A	Shoot biomass	25.156	3.72	5	3.4596	25.81	4.38	5	4.7961	0.0256656	0.0101333
1	23	Afzal	Xianglushan (119◦13′41′′ E, 32◦07′42.9′′ N) around Zhenjiang in Jiangsu Province, China.	2024	Solidago canadensis	Plant	Biological	1	A	Shoot biomass	21.22	3.5	5	3.0625	18.59	3.06	5	2.3409	-0.13232	0.0108599
1	24	Afzal	Xianglushan (119◦13′41′′ E, 32◦07′42.9′′ N) around Zhenjiang in Jiangsu Province, China.	2024	Sorghum bicolor	Plant	Biological	1	A	Shoot biomass	21.22	3.5	5	3.0625	19.47	3.5	5	3.0625	-0.0860693	0.011904
1	25	Afzal	Xianglushan (119◦13′41′′ E, 32◦07′42.9′′ N) around Zhenjiang in Jiangsu Province, China.	2024	Solidago canadensis	Plant	Biological	1	A	Longest leaf widht	1.925	0.495	5	0.0612562	1.74	0.31	5	0.024025	-0.101041	0.0195728
1	26	Afzal	Xianglushan (119◦13′41′′ E, 32◦07′42.9′′ N) around Zhenjiang in Jiangsu Province, China.	2024	Sorghum bicolor	Plant	Biological	1	A	Longest leaf widht	1.925	0.495	5	0.0612562	1.49	0.31	5	0.024025	-0.25615	0.0218818
1	27	Afzal	Xianglushan (119◦13′41′′ E, 32◦07′42.9′′ N) around Zhenjiang in Jiangsu Province, China.	2024	Solidago canadensis	Plant	Biological	1	A	Longest leaf widht	0.43	0.13	5	0.004225	0.43	0.05	5	0.000625	0	0.0209843
1	28	Afzal	Xianglushan (119◦13′41′′ E, 32◦07′42.9′′ N) around Zhenjiang in Jiangsu Province, China.	2024	Sorghum bicolor	Plant	Biological	1	A	Longest leaf widht	0.43	0.13	5	0.004225	0.31	0.12	5	0.0036	-0.327213	0.0482489
1	29	Afzal	Xianglushan (119◦13′41′′ E, 32◦07′42.9′′ N) around Zhenjiang in Jiangsu Province, China.	2024	Solidago canadensis	Plant	Biological	1	A	Longest leaf widht	8.07	0.87	5	0.189225	6.46	1.117	5	0.311922	-0.222524	0.00830405
1	30	Afzal	Xianglushan (119◦13′41′′ E, 32◦07′42.9′′ N) around Zhenjiang in Jiangsu Province, China.	2024	Sorghum bicolor	Plant	Biological	1	A	Longest leaf widht	8.07	0.87	5	0.189225	7.88	0.69	5	0.119025	-0.0238256	0.00385793
1	31	Afzal	Xianglushan (119◦13′41′′ E, 32◦07′42.9′′ N) around Zhenjiang in Jiangsu Province, China.	2024	Solidago canadensis	Plant	Biological	1	A	Longest leaf widht	4.4	0.88	5	0.1936	3.85	0.249	5	0.0155003	-0.133531	0.00883658
1	32	Afzal	Xianglushan (119◦13′41′′ E, 32◦07′42.9′′ N) around Zhenjiang in Jiangsu Province, China.	2024	Sorghum bicolor	Plant	Biological	1	A	Longest leaf widht	4.4	0.88	5	0.1936	4.16	0.43	5	0.046225	-0.0560895	0.0101369
1	33	Afzal	Xianglushan (119◦13′41′′ E, 32◦07′42.9′′ N) around Zhenjiang in Jiangsu Province, China.	2024	Solidago canadensis	Plant	Biological	1	A	Number leaves	379	34.05	5	289.851	354	27.98	5	195.72	-0.0682393	0.00286376
1	34	Afzal	Xianglushan (119◦13′41′′ E, 32◦07′42.9′′ N) around Zhenjiang in Jiangsu Province, China.	2024	Sorghum bicolor	Plant	Biological	1	A	Number leaves	379	34.05	5	289.851	239	31.18	5	243.048	-0.461073	0.00501828
1	35	Afzal	Xianglushan (119◦13′41′′ E, 32◦07′42.9′′ N) around Zhenjiang in Jiangsu Province, China.	2024	Solidago canadensis	Plant	Biological	1	A	Number leaves	273	31.35	5	245.706	230	33.97	5	288.49	-0.171392	0.00700022
1	36	Afzal	Xianglushan (119◦13′41′′ E, 32◦07′42.9′′ N) around Zhenjiang in Jiangsu Province, China.	2024	Sorghum bicolor	Plant	Biological	1	A	Number leaves	273	31.35	5	245.706	202	12.29	5	37.761	-0.301204	0.00337776
1	37	Afzal	Xianglushan (119◦13′41′′ E, 32◦07′42.9′′ N) around Zhenjiang in Jiangsu Province, China.	2024	Solidago canadensis	Plant	Biological	1	A	Number leaves	31	3.16	5	2.4964	25	2.95	5	2.17563	-0.215111	0.00486297
1	38	Afzal	Xianglushan (119◦13′41′′ E, 32◦07′42.9′′ N) around Zhenjiang in Jiangsu Province, China.	2024	Sorghum bicolor	Plant	Biological	1	A	Number leaves	31	3.16	5	2.4964	28	3.06	5	2.3409	-0.101783	0.00446684
1	39	Afzal	Xianglushan (119◦13′41′′ E, 32◦07′42.9′′ N) around Zhenjiang in Jiangsu Province, China.	2024	Solidago canadensis	Plant	Biological	1	A	Number leaves	53	2.6	5	1.69	50	5.9	5	8.7025	-0.0582689	0.00326611
1	40	Afzal	Xianglushan (119◦13′41′′ E, 32◦07′42.9′′ N) around Zhenjiang in Jiangsu Province, China.	2024	Sorghum bicolor	Plant	Biological	1	A	Number leaves	53	2.6	5	1.69	50	5.9	5	8.7025	-0.0582689	0.00326611
1	41	Afzal	Xianglushan (119◦13′41′′ E, 32◦07′42.9′′ N) around Zhenjiang in Jiangsu Province, China.	2024	Solidago canadensis	Plant	Biological	1	A	Root lenght	28.54	6.46	5	10.4329	25.32	3.87	5	3.74423	-0.119712	0.014919
1	42	Afzal	Xianglushan (119◦13′41′′ E, 32◦07′42.9′′ N) around Zhenjiang in Jiangsu Province, China.	2024	Sorghum bicolor	Plant	Biological	1	A	Root lenght	28.54	6.46	5	10.4329	23.387	1.935	5	0.936056	-0.199126	0.0116159
1	43	Afzal	Xianglushan (119◦13′41′′ E, 32◦07′42.9′′ N) around Zhenjiang in Jiangsu Province, China.	2024	Solidago canadensis	Plant	Biological	1	A	Root lenght	34.35	5.166	5	6.67189	40.8	2.587	5	1.67314	0.17208	0.0053277
1	44	Afzal	Xianglushan (119◦13′41′′ E, 32◦07′42.9′′ N) around Zhenjiang in Jiangsu Province, China.	2024	Sorghum bicolor	Plant	Biological	1	A	Root lenght	34.35	5.166	5	6.67189	47.9	5.16	5	6.6564	0.332513	0.00684452
1	45	Afzal	Xianglushan (119◦13′41′′ E, 32◦07′42.9′′ N) around Zhenjiang in Jiangsu Province, China.	2024	Solidago canadensis	Plant	Biological	1	A	Root lenght	31.77	1.29	5	0.416025	28.55	7.095	5	12.5848	-0.106866	0.0126813
1	46	Afzal	Xianglushan (119◦13′41′′ E, 32◦07′42.9′′ N) around Zhenjiang in Jiangsu Province, China.	2024	Sorghum bicolor	Plant	Biological	1	A	Root lenght	31.77	1.29	5	0.416025	31.13	7.096	5	12.5883	-0.0203505	0.0107217
1	47	Afzal	Xianglushan (119◦13′41′′ E, 32◦07′42.9′′ N) around Zhenjiang in Jiangsu Province, China.	2024	Solidago canadensis	Plant	Biological	1	A	Root lenght	34.35	8.39	5	17.598	28.55	4.514	5	5.09405	-0.184945	0.0169313
1	48	Afzal	Xianglushan (119◦13′41′′ E, 32◦07′42.9′′ N) around Zhenjiang in Jiangsu Province, China.	2024	Sorghum bicolor	Plant	Biological	1	A	Root lenght	34.35	8.39	5	17.598	31.77	2.58	5	1.6641	-0.0780796	0.0132506
1	49	Afzal	Xianglushan (119◦13′41′′ E, 32◦07′42.9′′ N) around Zhenjiang in Jiangsu Province, China.	2024	Solidago canadensis	Plant	Biological	1	A	Root biomass	4.72	0.77	5	0.148225	2.8	1.03	5	0.265225	-0.522189	0.0323864
1	50	Afzal	Xianglushan (119◦13′41′′ E, 32◦07′42.9′′ N) around Zhenjiang in Jiangsu Province, China.	2024	Sorghum bicolor	Plant	Biological	1	A	Root biomass	4.72	0.77	5	0.148225	1.9	0.78	5	0.1521	-0.909955	0.039029
1	51	Afzal	Xianglushan (119◦13′41′′ E, 32◦07′42.9′′ N) around Zhenjiang in Jiangsu Province, China.	2024	Solidago canadensis	Plant	Biological	1	A	Root biomass	6.51	2.04	5	1.0404	8.04	1.28	5	0.4096	0.21109	0.0247086
1	52	Afzal	Xianglushan (119◦13′41′′ E, 32◦07′42.9′′ N) around Zhenjiang in Jiangsu Province, China.	2024	Sorghum bicolor	Plant	Biological	1	A	Root biomass	6.51	2.04	5	1.0404	8.68	1.91	5	0.912025	0.287682	0.0293235
1	53	Afzal	Xianglushan (119◦13′41′′ E, 32◦07′42.9′′ N) around Zhenjiang in Jiangsu Province, China.	2024	Solidago canadensis	Plant	Biological	1	A	Root biomass	7.79	2.04	5	1.0404	5.23	1.15	5	0.330625	-0.39843	0.0233855
1	54	Afzal	Xianglushan (119◦13′41′′ E, 32◦07′42.9′′ N) around Zhenjiang in Jiangsu Province, China.	2024	Sorghum bicolor	Plant	Biological	1	A	Root biomass	7.79	2.04	5	1.0404	6.51	1.915	5	0.916806	-0.179501	0.031022
1	55	Afzal	Xianglushan (119◦13′41′′ E, 32◦07′42.9′′ N) around Zhenjiang in Jiangsu Province, China.	2024	Solidago canadensis	Plant	Biological	1	A	Root biomass	2.55	0.64	5	0.1024	1.915	0.765	5	0.146306	-0.286376	0.0445147
1	56	Afzal	Xianglushan (119◦13′41′′ E, 32◦07′42.9′′ N) around Zhenjiang in Jiangsu Province, China.	2024	Sorghum bicolor	Plant	Biological	1	A	Root biomass	2.55	0.64	5	0.1024	2.04	0.38	5	0.0361	-0.223144	0.0195379
1	57	Afzal	Xianglushan (119◦13′41′′ E, 32◦07′42.9′′ N) around Zhenjiang in Jiangsu Province, China.	2024	Solidago canadensis	Plant	Biological	1	A	Chlorophyll content	38.48	0.65	5	0.105625	36.52	0.65	5	0.105625	-0.0522786	0.000120424
1	58	Afzal	Xianglushan (119◦13′41′′ E, 32◦07′42.9′′ N) around Zhenjiang in Jiangsu Province, China.	2024	Sorghum bicolor	Plant	Biological	1	A	Chlorophyll content	38.48	0.65	5	0.105625	34.56	2.61	5	1.70302	-0.107442	0.00119775
1	59	Afzal	Xianglushan (119◦13′41′′ E, 32◦07′42.9′′ N) around Zhenjiang in Jiangsu Province, China.	2024	Solidago canadensis	Plant	Biological	1	A	Chlorophyll content	46.95	1.31	5	0.429025	43.69	1.96	5	0.9604	-0.071964	0.000558216
1	60	Afzal	Xianglushan (119◦13′41′′ E, 32◦07′42.9′′ N) around Zhenjiang in Jiangsu Province, China.	2024	Sorghum bicolor	Plant	Biological	1	A	Chlorophyll content	46.95	1.31	5	0.429025	40.43	3.92	5	3.8416	-0.149511	0.00203586
1	61	Afzal	Xianglushan (119◦13′41′′ E, 32◦07′42.9′′ N) around Zhenjiang in Jiangsu Province, China.	2024	Solidago canadensis	Plant	Biological	1	A	Chlorophyll content	38.5	1.93	5	0.931225	36.52	0.325	5	0.0264063	-0.0527982	0.00051844
1	62	Afzal	Xianglushan (119◦13′41′′ E, 32◦07′42.9′′ N) around Zhenjiang in Jiangsu Province, China.	2024	Sorghum bicolor	Plant	Biological	1	A	Chlorophyll content	38.5	1.93	5	0.931225	37.17	0.65	5	0.105625	-0.0351563	0.000563761
1	63	Afzal	Xianglushan (119◦13′41′′ E, 32◦07′42.9′′ N) around Zhenjiang in Jiangsu Province, China.	2024	Solidago canadensis	Plant	Biological	1	A	Chlorophyll content	41.74	0.65	5	0.105625	37.83	0.65	5	0.105625	-0.0983575	0.000107546
1	64	Afzal	Xianglushan (119◦13′41′′ E, 32◦07′42.9′′ N) around Zhenjiang in Jiangsu Province, China.	2024	Sorghum bicolor	Plant	Biological	1	A	Chlorophyll content	41.74	0.65	5	0.105625	38.48	1.95	5	0.950625	-0.0813213	0.000562106
2	65	Wei	China, Wuhan (30.48° N, 114.35° E)	2023	Maize	Plant	Biological	2	A	Specific leaf area (LSA)	0.231	0.008	149	4.32432e-07	0.215	0.004	138	1.16788e-07	-0.0717797	1.05577e-05
2	66	Wei	China, Wuhan (30.48° N, 114.35° E)	2023	Maize	Plant	Biological	2	A	Shoot mass	2.919	0.054	149	1.97027e-05	2.649	0.108	138	8.51387e-05	-0.0970589	1.43418e-05
2	67	Wei	China, Wuhan (30.48° N, 114.35° E)	2023	Maize	Plant	Biological	2	A	total mass	3.081	0.108	149	7.88108e-05	2.865	0.108	138	8.51387e-05	-0.0726859	1.85439e-05
3	68	Fahey	Florida (29°37′42″N, 82°21′13″W)	2021	cogongrass Imperata cylindrica	Plant	Biological	48	A	total biomass	7.52	4.43791	80	0.249304	7.21587	2.27753	80	0.0656601	-0.0412827	0.00559869
3	69	Fahey	Florida (29°37′42″N, 82°21′13″W)	2021	cogongrass Imperata cylindrica	Plant	Biological	48	A	total biomass	9.46275	5.00061	80	0.316533	6.95225	3.96736	80	0.19924	-0.308298	0.00756142
4	70	Nsikani	South Africa (33°46′5.16″S; 18°27′10.08″E)	2021	Acacia saligna	Plant	Biological	120	B	root dry mass	0.5246	0.984	100	0.00978036	1.83	0.722	100	0.00526549	1.24944	0.0367396
4	71	Nsikani	South Africa (33°46′5.16″S; 18°27′10.08″E)	2021	Acacia saligna	Plant	Biological	120	B	root dry mass	0.5246	0.984	100	0.00978036	3.34	0.915	100	0.00845682	1.85109	0.0359336
4	72	Nsikani	South Africa (33°46′5.16″S; 18°27′10.08″E)	2021	Acacia saligna	Plant	Biological	120	B	root dry mass	0.5246	0.984	100	0.00978036	2.098	0.853	100	0.00734959	1.3861	0.0368361
4	73	Nsikani	South Africa (33°46′5.16″S; 18°27′10.08″E)	2021	Acacia saligna	Plant	Biological	120	B	root dry mass	0.444	0.695	100	0.00487904	0.635	0.571	100	0.00329334	0.3578	0.032588
4	74	Nsikani	South Africa (33°46′5.16″S; 18°27′10.08″E)	2021	Acacia saligna	Plant	Biological	120	B	root dry mass	0.444	0.695	100	0.00487904	1.0476	0.53	100	0.00283737	0.858433	0.0270617
4	75	Nsikani	South Africa (33°46′5.16″S; 18°27′10.08″E)	2021	Acacia saligna	Plant	Biological	120	B	root dry mass	0.444	0.695	100	0.00487904	1.492	1.016	100	0.0104268	1.21205	0.0291393
4	76	Nsikani	South Africa (33°46′5.16″S; 18°27′10.08″E)	2021	Acacia saligna	Plant	Biological	120	B	root dry mass	0.0444	0.1185	100	0.000141841	0.1037	0.1186	100	0.00014208	0.848263	0.0843114
4	77	Nsikani	South Africa (33°46′5.16″S; 18°27′10.08″E)	2021	Acacia saligna	Plant	Biological	120	B	root dry mass	0.0444	0.1185	100	0.000141841	0.34	0.163	100	0.000268374	2.03571	0.0735296
4	78	Nsikani	South Africa (33°46′5.16″S; 18°27′10.08″E)	2021	Acacia saligna	Plant	Biological	120	B	root dry mass	0.0444	0.1185	100	0.000141841	0.8	0.192	100	0.000372364	2.89137	0.0718073
4	79	Nsikani	South Africa (33°46′5.16″S; 18°27′10.08″E)	2021	Acacia saligna	Plant	Biological	120	B	root dry mass	0.0167	0.04	100	1.61616e-05	0.1	0.05	100	2.52525e-05	1.78976	0.0598703
4	80	Nsikani	South Africa (33°46′5.16″S; 18°27′10.08″E)	2021	Acacia saligna	Plant	Biological	120	B	root dry mass	0.0167	0.04	100	1.61616e-05	0.283	0.05	100	2.52525e-05	2.83004	0.0576824
4	81	Nsikani	South Africa (33°46′5.16″S; 18°27′10.08″E)	2021	Acacia saligna	Plant	Biological	120	B	root dry mass	0.0167	0.04	100	1.61616e-05	0.45	0.09	100	8.18182e-05	3.29384	0.0577703
4	82	Nsikani	South Africa (33°46′5.16″S; 18°27′10.08″E)	2021	Acacia saligna	Plant	Biological	120	B	root dry mass	0.404	0.231	100	0.000539	0.557	0.21	100	0.000445455	0.32115	0.00469079
4	83	Nsikani	South Africa (33°46′5.16″S; 18°27′10.08″E)	2021	Acacia saligna	Plant	Biological	120	B	root dry mass	0.404	0.231	100	0.000539	0.923	0.173	100	0.000302313	0.826214	0.00362066
4	84	Nsikani	South Africa (33°46′5.16″S; 18°27′10.08″E)	2021	Acacia saligna	Plant	Biological	120	B	root dry mass	0.404	0.231	100	0.000539	1.25	0.323	100	0.00105383	1.12948	0.00393705
5	85	Connell	Kansas (39° 5′ 35″ N, 96° 33′ 31″ W)	2021	Bromus inermis	Plant	Biological	10.27	A	Total biomass	0.86	0.15	20	0.00118421	1.19	0.15	20	0.00118421	0.324776	0.00231553
5	86	Connell	Kansas (39° 5′ 35″ N, 96° 33′ 31″ W)	2021	Bromus inermis	Plant	Biological	10.27	A	Root: shoot	0.2	0.03	20	4.73684e-05	0.38	0.09	20	0.000426316	0.641854	0.00392971
6	87	Pickett	Santa Monica Mountains National Recreation Area. (34.09° N 118.57° W)	2019	Phalaris aquatica	Plant	Biological	132	B	Germination rate	0.024	0.01	40	2.5641e-06	0.0098	0.0074	40	1.4041e-06	-0.895671	0.0185948
6	88	Pickett	Santa Monica Mountains National Recreation Area. (34.09° N 118.57° W)	2019	Phalaris aquatica	Plant	Biological	132	B	Germination rate	0.027	0.022	40	1.24103e-05	0.034	0.017	40	7.41026e-06	0.230524	0.0228481
6	89	Pickett	Santa Monica Mountains National Recreation Area. (34.09° N 118.57° W)	2019	Phalaris aquatica	Plant	Biological	132	B	Germination rate	0.106	0.019	40	9.25641e-06	0.116	0.02	40	1.02564e-05	0.0901511	0.00154638
6	90	Pickett	Santa Monica Mountains National Recreation Area. (34.09° N 118.57° W)	2019	Phalaris aquatica	Plant	Biological	132	B	Plant biomass	0.128	0.04	40	4.10256e-05	0.04	0.02	40	1.02564e-05	-1.16315	0.00869141
6	91	Pickett	Santa Monica Mountains National Recreation Area. (34.09° N 118.57° W)	2019	Phalaris aquatica	Plant	Biological	132	B	Plant biomass	0.043	0.028	40	2.01026e-05	0.028	0.01	40	2.5641e-06	-0.428996	0.0137891
6	92	Pickett	Santa Monica Mountains National Recreation Area. (34.09° N 118.57° W)	2019	Phalaris aquatica	Plant	Biological	132	B	Plant biomass	0.196	0.042	40	4.52308e-05	0.189	0.042	40	4.52308e-05	-0.0363676	0.00238253
7	93	Jones	Nant Gwynant catchment, Snowdonia National Park (SNP), Wales	2019	Rhododendron ponticum	Plant	Biological	36	A	% germination	79	2.5	10	0.694444	75.5	3.5	10	1.36111	-0.0453152	0.000315047
7	94	Jones	Nant Gwynant catchment, Snowdonia National Park (SNP), Wales	2019	Rhododendron ponticum	Plant	Biological	96	B	% germination	75	2	10	0.444444	80	3	10	1	0.0645385	0.000211736
8	95	Stanbury	south-west of Western Australia	2018	Pinus pinaster	Plant	Biological	12	A	Maximum germination	0.79	0.18	4	0.0108	0.65	0.18	4	0.0108	-0.195061	0.0321503
8	96	Stanbury	south-west of Western Australia	2018	Pinus pinaster	Plant	Biological	60	A	Maximum germination	0.79	0.18	4	0.0108	0.7	0.1	4	0.00333333	-0.120953	0.0180807
8	97	Stanbury	south-west of Western Australia	2018	Pinus pinaster	Plant	Biological	84	B	Maximum germination	0.79	0.18	4	0.0108	0.78	0.14	4	0.00653333	-0.012739	0.0210326
8	98	Stanbury	south-west of Western Australia	2018	Pinus pinaster	Plant	Biological	12	A	Maximum germination	0.67	0.12	4	0.0048	0.71	0.16	4	0.00853333	0.0579873	0.0207155
8	99	Stanbury	south-west of Western Australia	2018	Pinus pinaster	Plant	Biological	60	A	Maximum germination	0.67	0.12	4	0.0048	0.67	0.18	4	0.0108	0	0.0260637
8	100	Stanbury	south-west of Western Australia	2018	Pinus pinaster	Plant	Biological	84	B	Maximum germination	0.67	0.12	4	0.0048	0.59	0.18	4	0.0108	-0.127155	0.0312888
8	101	Stanbury	south-west of Western Australia	2018	Pinus pinaster	Plant	Biological	12	A	Maximum germination	0.35	0.12	4	0.0048	0.35	0.12	4	0.0048	0	0.0587755
8	102	Stanbury	south-west of Western Australia	2018	Pinus pinaster	Plant	Biological	60	A	Maximum germination	0.35	0.12	4	0.0048	0.28	0.28	4	0.0261333	-0.223144	0.279388
8	103	Stanbury	south-west of Western Australia	2018	Pinus pinaster	Plant	Biological	84	B	Maximum germination	0.35	0.12	4	0.0048	0.25	0.16	4	0.00853333	-0.336472	0.131788
8	104	Stanbury	south-west of Western Australia	2018	Pinus pinaster	Plant	Biological	12	A	Maximum germination	0.41	0.18	4	0.0108	0.4	0.26	4	0.0225333	-0.0246926	0.153811
8	105	Stanbury	south-west of Western Australia	2018	Pinus pinaster	Plant	Biological	60	A	Maximum germination	0.41	0.18	4	0.0108	0.28	0.06	4	0.0012	-0.381368	0.0596652
8	106	Stanbury	south-west of Western Australia	2018	Pinus pinaster	Plant	Biological	84	B	Maximum germination	0.41	0.18	4	0.0108	0.32	0.2	4	0.0133333	-0.247836	0.145842
8	107	Stanbury	south-west of Western Australia	2018	Pinus pinaster	Plant	Biological	12	A	Maximum germination	0.34	0.2	4	0.0133333	0.37	0.24	4	0.0192	0.0845574	0.191691
8	108	Stanbury	south-west of Western Australia	2018	Pinus pinaster	Plant	Biological	60	A	Maximum germination	0.34	0.2	4	0.0133333	0.19	0.16	4	0.00853333	-0.581922	0.263791
8	109	Stanbury	south-west of Western Australia	2018	Pinus pinaster	Plant	Biological	84	B	Maximum germination	0.34	0.2	4	0.0133333	0.16	0.12	4	0.0048	-0.753772	0.22713
8	110	Stanbury	south-west of Western Australia	2018	Pinus pinaster	Plant	Biological	12	A	Maximum germination	0.74	0.04	4	0.000533333	0.74	0.16	4	0.00853333	0	0.0124178
8	111	Stanbury	south-west of Western Australia	2018	Pinus pinaster	Plant	Biological	60	A	Maximum germination	0.74	0.04	4	0.000533333	0.83	0.04	4	0.000533333	0.114776	0.0013111
8	112	Stanbury	south-west of Western Australia	2018	Pinus pinaster	Plant	Biological	84	B	Maximum germination	0.74	0.04	4	0.000533333	0.64	0.22	4	0.0161333	-0.145182	0.0302715
8	113	Stanbury	south-west of Western Australia	2018	Pinus pinaster	Plant	Biological	12	A	Maximum germination	0.44	0.18	4	0.0108	0.72	0.2	4	0.0133333	0.492476	0.061129
8	114	Stanbury	south-west of Western Australia	2018	Pinus pinaster	Plant	Biological	60	A	Maximum germination	0.44	0.18	4	0.0108	0.43	0.3	4	0.03	-0.0229895	0.163526
8	115	Stanbury	south-west of Western Australia	2018	Pinus pinaster	Plant	Biological	84	B	Maximum germination	0.44	0.18	4	0.0108	0.45	0.18	4	0.0108	0.0224729	0.0818388
8	116	Stanbury	south-west of Western Australia	2018	Pinus pinaster	Plant	Biological	12	A	Maximum germination	0.91	0.14	4	0.00653333	0.96	0.1	4	0.00333333	0.0534887	0.00862983
8	117	Stanbury	south-west of Western Australia	2018	Pinus pinaster	Plant	Biological	60	A	Maximum germination	0.91	0.14	4	0.00653333	0.96	0.06	4	0.0012	0.0534887	0.00689372
8	118	Stanbury	south-west of Western Australia	2018	Pinus pinaster	Plant	Biological	84	B	Maximum germination	0.91	0.14	4	0.00653333	0.93	0.1	4	0.00333333	0.02174	0.00880767
8	119	Stanbury	south-west of Western Australia	2018	Pinus pinaster	Plant	Biological	12	A	Maximum germination	0.78	0.22	4	0.0161333	0.81	0.36	4	0.0432	0.0377403	0.0692709
8	120	Stanbury	south-west of Western Australia	2018	Pinus pinaster	Plant	Biological	60	A	Maximum germination	0.78	0.22	4	0.0161333	0.73	0.24	4	0.0192	-0.0662494	0.0469102
8	121	Stanbury	south-west of Western Australia	2018	Pinus pinaster	Plant	Biological	84	B	Maximum germination	0.78	0.22	4	0.0161333	0.79	0.16	4	0.00853333	0.012739	0.030143
8	122	Stanbury	south-west of Western Australia	2018	Pinus pinaster	Plant	Biological	12	A	Maximum germination	0.97	0.04	4	0.000533333	0.96	0.1	4	0.00333333	-0.0103628	0.0031378
8	123	Stanbury	south-west of Western Australia	2018	Pinus pinaster	Plant	Biological	60	A	Maximum germination	0.97	0.04	4	0.000533333	1	0	4	0	0.0304592	0.000425125
8	124	Stanbury	south-west of Western Australia	2018	Pinus pinaster	Plant	Biological	84	B	Maximum germination	0.97	0.04	4	0.000533333	0.97	0.08	4	0.00213333	0	0.00212562
8	125	Stanbury	south-west of Western Australia	2018	Pinus pinaster	Plant	Biological	12	A	L.A (LEAF AREA)	2.72	0.885438	10	0.0871111	2.24	0.758947	10	0.064	-0.194156	0.0220765
8	126	Stanbury	south-west of Western Australia	2018	Pinus pinaster	Plant	Biological	60	A	L.A (LEAF AREA)	2.72	0.885438	10	0.0871111	3.05	1.61276	10	0.289	0.11451	0.0385571
8	127	Stanbury	south-west of Western Australia	2018	Pinus pinaster	Plant	Biological	84	B	L.A (LEAF AREA)	2.72	0.885438	10	0.0871111	4.04	1.54952	10	0.266778	0.395613	0.0253075
8	128	Stanbury	south-west of Western Australia	2018	Pinus pinaster	Plant	Biological	12	A	RW (ROOT WEIGHT DRY)	0.09	0.0948683	10	0.001	0.07	0.0948683	10	0.001	-0.251314	0.294785
8	129	Stanbury	south-west of Western Australia	2018	Pinus pinaster	Plant	Biological	60	A	RW (ROOT WEIGHT DRY)	0.09	0.0948683	10	0.001	0.12	0.0948683	10	0.001	0.287682	0.173611
8	130	Stanbury	south-west of Western Australia	2018	Pinus pinaster	Plant	Biological	84	B	RW (ROOT WEIGHT DRY)	0.09	0.0948683	10	0.001	0.09	0.0632456	10	0.000444444	0	0.160494
8	131	Stanbury	south-west of Western Australia	2018	Pinus pinaster	Plant	Biological	12	A	SW (SHOOT WEIGHT DRY)	0.07	0.0316228	10	0.000111111	0.05	0	10	0	-0.336472	0.0204082
8	132	Stanbury	south-west of Western Australia	2018	Pinus pinaster	Plant	Biological	60	A	SW (SHOOT WEIGHT DRY)	0.07	0.0316228	10	0.000111111	0.08	0.0316228	10	0.000111111	0.133531	0.0360332
8	133	Stanbury	south-west of Western Australia	2018	Pinus pinaster	Plant	Biological	84	B	SW (SHOOT WEIGHT DRY)	0.07	0.0316228	10	0.000111111	0.1	0.0316228	10	0.000111111	0.356675	0.0304082
8	134	Stanbury	south-west of Western Australia	2018	Pinus pinaster	Plant	Biological	12	A	TDW (TOTAL DRY WEIGHT)	0.16	0.0316228	10	0.000111111	0.12	0.0316228	10	0.000111111	-0.287682	0.0108507
8	135	Stanbury	south-west of Western Australia	2018	Pinus pinaster	Plant	Biological	60	A	TDW (TOTAL DRY WEIGHT)	0.16	0.0316228	10	0.000111111	0.2	0.0632456	10	0.000444444	0.223144	0.0139063
8	136	Stanbury	south-west of Western Australia	2018	Pinus pinaster	Plant	Biological	84	B	TDW (TOTAL DRY WEIGHT)	0.16	0.0316228	10	0.000111111	0.19	0.0316228	10	0.000111111	0.17185	0.00667633
8	137	Stanbury	south-west of Western Australia	2018	Pinus pinaster	Plant	Biological	12	A	LAR (LEAF AREA RATIO)	0.06	0	10	0	0.05	0.0316228	10	0.000111111	-0.182322	0.04
8	138	Stanbury	south-west of Western Australia	2018	Pinus pinaster	Plant	Biological	60	A	LAR (LEAF AREA RATIO)	0.06	0	10	0	0.07	0.0316228	10	0.000111111	0.154151	0.0204082
8	139	Stanbury	south-west of Western Australia	2018	Pinus pinaster	Plant	Biological	84	B	LAR (LEAF AREA RATIO)	0.06	0	10	0	0.05	0.0316228	10	0.000111111	-0.182322	0.04
8	140	Stanbury	south-west of Western Australia	2018	Pinus pinaster	Plant	Biological	12	A	LMR (LEAF MASS RATIO)	0.46	0.126491	10	0.00177778	0.46	0.284605	10	0.009	0	0.0458412
8	141	Stanbury	south-west of Western Australia	2018	Pinus pinaster	Plant	Biological	60	A	LMR (LEAF MASS RATIO)	0.46	0.126491	10	0.00177778	0.43	0.158114	10	0.00277778	-0.0674413	0.0210823
8	142	Stanbury	south-west of Western Australia	2018	Pinus pinaster	Plant	Biological	84	B	LMR (LEAF MASS RATIO)	0.46	0.126491	10	0.00177778	0.54	0.221359	10	0.00544444	0.160343	0.0243653
8	143	Stanbury	south-west of Western Australia	2018	Pinus pinaster	Plant	Biological	12	A	R:S (ROOT TO SHOOT RATIO)	1.18	0.56921	10	0.036	1.26	1.3914	10	0.215111	0.0655973	0.145214
8	144	Stanbury	south-west of Western Australia	2018	Pinus pinaster	Plant	Biological	60	A	R:S (ROOT TO SHOOT RATIO)	1.18	0.56921	10	0.036	1.38	0.885438	10	0.0871111	0.156569	0.064437
8	145	Stanbury	south-west of Western Australia	2018	Pinus pinaster	Plant	Biological	84	B	R:S (ROOT TO SHOOT RATIO)	1.18	0.56921	10	0.036	0.86	0.695701	10	0.0537778	-0.316337	0.08871
8	146	Stanbury	south-west of Western Australia	2018	Pinus pinaster	Plant	Biological	12	A	L.A (LEAF AREA)	15.83	8.75951	10	8.52544	29.27	8.94925	10	8.89878	0.614656	0.0399677
8	147	Stanbury	south-west of Western Australia	2018	Pinus pinaster	Plant	Biological	60	A	L.A (LEAF AREA)	15.83	8.75951	10	8.52544	49.49	204.441	10	4644.02	1.13986	1.7371
8	148	Stanbury	south-west of Western Australia	2018	Pinus pinaster	Plant	Biological	84	B	L.A (LEAF AREA)	15.83	8.75951	10	8.52544	48.58	39.5917	10	174.167	1.12131	0.0970387
8	149	Stanbury	south-west of Western Australia	2018	Pinus pinaster	Plant	Biological	12	A	SH (STEM HEIGHT)	32.16	22.7684	10	57.6	67.6	42.754	10	203.1	0.742885	0.0901225
8	150	Stanbury	south-west of Western Australia	2018	Pinus pinaster	Plant	Biological	60	A	SH (STEM HEIGHT)	32.16	22.7684	10	57.6	50	34.8167	10	134.689	0.4413	0.0986106
8	151	Stanbury	south-west of Western Australia	2018	Pinus pinaster	Plant	Biological	84	B	SH (STEM HEIGHT)	32.16	22.7684	10	57.6	88.56	92.5599	10	951.925	1.01296	0.15936
8	152	Stanbury	south-west of Western Australia	2018	Pinus pinaster	Plant	Biological	12	A	RW (ROOT WEIGHT DRY)	0.13	0.0316228	10	0.000111111	0.29	0.189737	10	0.004	0.802346	0.0487233
8	153	Stanbury	south-west of Western Australia	2018	Pinus pinaster	Plant	Biological	60	A	RW (ROOT WEIGHT DRY)	0.13	0.0316228	10	0.000111111	0.2	0.0948683	10	0.001	0.430783	0.0284172
8	154	Stanbury	south-west of Western Australia	2018	Pinus pinaster	Plant	Biological	84	B	RW (ROOT WEIGHT DRY)	0.13	0.0316228	10	0.000111111	0.32	0.347851	10	0.0134444	0.900787	0.124081
8	155	Stanbury	south-west of Western Australia	2018	Pinus pinaster	Plant	Biological	12	A	SW (SHOOT WEIGHT DRY)	0.18	0.0948683	10	0.001	0.39	0.126491	10	0.00177778	0.77319	0.0382972
8	156	Stanbury	south-west of Western Australia	2018	Pinus pinaster	Plant	Biological	60	A	SW (SHOOT WEIGHT DRY)	0.18	0.0948683	10	0.001	0.27	0.158114	10	0.00277778	0.405465	0.0620713
8	157	Stanbury	south-west of Western Australia	2018	Pinus pinaster	Plant	Biological	84	B	SW (SHOOT WEIGHT DRY)	0.18	0.0948683	10	0.001	0.61	0.56921	10	0.036	1.2205	0.114851
8	158	Stanbury	south-west of Western Australia	2018	Pinus pinaster	Plant	Biological	12	A	TDW (TOTAL DRY WEIGHT)	0.32	0.0632456	10	0.000444444	0.69	0.126491	10	0.00177778	0.768371	0.00726689
8	159	Stanbury	south-west of Western Australia	2018	Pinus pinaster	Plant	Biological	60	A	TDW (TOTAL DRY WEIGHT)	0.32	0.0632456	10	0.000444444	0.47	0.0948683	10	0.001	0.384412	0.00798049
8	160	Stanbury	south-west of Western Australia	2018	Pinus pinaster	Plant	Biological	84	B	TDW (TOTAL DRY WEIGHT)	0.32	0.0632456	10	0.000444444	0.94	0.411096	10	0.0187778	1.07756	0.0230326
8	161	Stanbury	south-west of Western Australia	2018	Pinus pinaster	Plant	Biological	60	A	LAR (LEAF AREA RATIO)	0.02	0	10	0	0.02	0.0316228	10	0.000111111	0	0.25
8	162	Stanbury	south-west of Western Australia	2018	Pinus pinaster	Plant	Biological	12	A	LMR (LEAF MASS RATIO)	0.48	0.0948683	10	0.001	0.47	0.0632456	10	0.000444444	-0.0210534	0.00571702
8	163	Stanbury	south-west of Western Australia	2018	Pinus pinaster	Plant	Biological	60	A	LMR (LEAF MASS RATIO)	0.48	0.0948683	10	0.001	0.47	0.0948683	10	0.001	-0.0210534	0.00798049
8	164	Stanbury	south-west of Western Australia	2018	Pinus pinaster	Plant	Biological	84	B	LMR (LEAF MASS RATIO)	0.48	0.0948683	10	0.001	0.53	0.0948683	10	0.001	0.0990909	0.00711024
8	165	Stanbury	south-west of Western Australia	2018	Pinus pinaster	Plant	Biological	12	A	R:S (ROOT TO SHOOT RATIO)	0.42	0.0948683	10	0.001	0.43	0.0948683	10	0.001	0.0235305	0.00996954
8	166	Stanbury	south-west of Western Australia	2018	Pinus pinaster	Plant	Biological	60	A	R:S (ROOT TO SHOOT RATIO)	0.42	0.0948683	10	0.001	0.43	0.158114	10	0.00277778	0.0235305	0.0186229
8	167	Stanbury	south-west of Western Australia	2018	Pinus pinaster	Plant	Biological	84	B	R:S (ROOT TO SHOOT RATIO)	0.42	0.0948683	10	0.001	0.34	0.0948683	10	0.001	-0.211309	0.0128875
8	168	Stanbury	south-west of Western Australia	2018	Pinus pinaster	Plant	Biological	12	A	L.A (LEAF AREA)	3.35	11.4158	10	14.4801	14.32	18.5626	10	38.2854	1.4527	1.32928
8	169	Stanbury	south-west of Western Australia	2018	Pinus pinaster	Plant	Biological	60	A	L.A (LEAF AREA)	3.35	11.4158	10	14.4801	10.2	19.701	10	43.1254	1.11343	1.5343
8	170	Stanbury	south-west of Western Australia	2018	Pinus pinaster	Plant	Biological	84	B	L.A (LEAF AREA)	3.35	11.4158	10	14.4801	8.48	4.42719	10	2.17778	0.92875	1.1885
8	171	Stanbury	south-west of Western Australia	2018	Pinus pinaster	Plant	Biological	12	A	SH (STEM HEIGHT)	39.75	108.593	10	1310.26	93.03	60.5576	10	407.469	0.850312	0.788695
8	172	Stanbury	south-west of Western Australia	2018	Pinus pinaster	Plant	Biological	60	A	SH (STEM HEIGHT)	39.75	108.593	10	1310.26	73.38	90.5993	10	912.025	0.613042	0.89876
8	173	Stanbury	south-west of Western Australia	2018	Pinus pinaster	Plant	Biological	84	B	SH (STEM HEIGHT)	39.75	108.593	10	1310.26	69.62	45.4736	10	229.76	0.560442	0.788985
8	174	Stanbury	south-west of Western Australia	2018	Pinus pinaster	Plant	Biological	12	A	RW (ROOT WEIGHT DRY)	0.04	0.189737	10	0.004	0.12	0.189737	10	0.004	1.09861	2.5
8	175	Stanbury	south-west of Western Australia	2018	Pinus pinaster	Plant	Biological	60	A	RW (ROOT WEIGHT DRY)	0.04	0.189737	10	0.004	0.09	0.221359	10	0.00544444	0.81093	2.85494
8	176	Stanbury	south-west of Western Australia	2018	Pinus pinaster	Plant	Biological	84	B	RW (ROOT WEIGHT DRY)	0.04	0.189737	10	0.004	0.07	0.0316228	10	0.000111111	0.559616	2.27041
8	177	Stanbury	south-west of Western Australia	2018	Pinus pinaster	Plant	Biological	12	A	SW (SHOOT WEIGHT DRY)	0.05	0.189737	10	0.004	0.18	0.221359	10	0.00544444	1.28093	1.59123
8	178	Stanbury	south-west of Western Australia	2018	Pinus pinaster	Plant	Biological	60	A	SW (SHOOT WEIGHT DRY)	0.05	0.189737	10	0.004	0.14	0.316228	10	0.0111111	1.02962	1.9502
8	179	Stanbury	south-west of Western Australia	2018	Pinus pinaster	Plant	Biological	84	B	SW (SHOOT WEIGHT DRY)	0.05	0.189737	10	0.004	0.1	0.0632456	10	0.000444444	0.693147	1.48
8	180	Stanbury	south-west of Western Australia	2018	Pinus pinaster	Plant	Biological	12	A	TDW (TOTAL DRY WEIGHT)	0.09	0.158114	10	0.00277778	0.31	0.189737	10	0.004	1.23676	0.346103
8	181	Stanbury	south-west of Western Australia	2018	Pinus pinaster	Plant	Biological	60	A	TDW (TOTAL DRY WEIGHT)	0.09	0.158114	10	0.00277778	0.23	0.252982	10	0.00711111	0.93827	0.429625
8	182	Stanbury	south-west of Western Australia	2018	Pinus pinaster	Plant	Biological	84	B	TDW (TOTAL DRY WEIGHT)	0.09	0.158114	10	0.00277778	0.18	0.0316228	10	0.000111111	0.693147	0.311728
8	183	Stanbury	south-west of Western Australia	2018	Pinus pinaster	Plant	Biological	12	A	LAR (LEAF AREA RATIO)	0.02	0.0316228	10	0.000111111	0.02	0	10	0	0	0.25
8	184	Stanbury	south-west of Western Australia	2018	Pinus pinaster	Plant	Biological	60	A	LAR (LEAF AREA RATIO)	0.02	0.0316228	10	0.000111111	0.02	0	10	0	0	0.25
8	185	Stanbury	south-west of Western Australia	2018	Pinus pinaster	Plant	Biological	84	B	LAR (LEAF AREA RATIO)	0.02	0.0316228	10	0.000111111	0.02	0	10	0	0	0.25
8	186	Stanbury	south-west of Western Australia	2018	Pinus pinaster	Plant	Biological	12	A	LMR (LEAF MASS RATIO)	0.43	0.442719	10	0.0217778	0.47	0.0632456	10	0.000444444	0.0889475	0.107814
8	187	Stanbury	south-west of Western Australia	2018	Pinus pinaster	Plant	Biological	60	A	LMR (LEAF MASS RATIO)	0.43	0.442719	10	0.0217778	0.49	0.189737	10	0.004	0.13062	0.120997
8	188	Stanbury	south-west of Western Australia	2018	Pinus pinaster	Plant	Biological	84	B	LMR (LEAF MASS RATIO)	0.43	0.442719	10	0.0217778	0.45	0.126491	10	0.00177778	0.0454624	0.113904
8	189	Stanbury	south-west of Western Australia	2018	Pinus pinaster	Plant	Biological	12	A	R:S (ROOT TO SHOOT RATIO)	0.46	0.411096	10	0.0187778	0.4	0.0948683	10	0.001	-0.139762	0.0854927
8	190	Stanbury	south-west of Western Australia	2018	Pinus pinaster	Plant	Biological	60	A	R:S (ROOT TO SHOOT RATIO)	0.46	0.411096	10	0.0187778	0.4	0.158114	10	0.00277778	-0.139762	0.0954927
8	191	Stanbury	south-west of Western Australia	2018	Pinus pinaster	Plant	Biological	84	B	R:S (ROOT TO SHOOT RATIO)	0.46	0.411096	10	0.0187778	0.42	0.126491	10	0.00177778	-0.0909718	0.088938
8	192	Stanbury	south-west of Western Australia	2018	Pinus pinaster	Plant	Biological	12	A	L.A (LEAF AREA)	8.42	7.84245	10	6.83378	10.31	5.91346	10	3.88544	0.202504	0.11965
8	193	Stanbury	south-west of Western Australia	2018	Pinus pinaster	Plant	Biological	60	A	L.A (LEAF AREA)	8.42	7.84245	10	6.83378	5.95	10.056	10	11.236	-0.347219	0.372393
8	194	Stanbury	south-west of Western Australia	2018	Pinus pinaster	Plant	Biological	84	B	L.A (LEAF AREA)	8.42	7.84245	10	6.83378	4.89	2.65631	10	0.784	-0.543418	0.11626
8	195	Stanbury	south-west of Western Australia	2018	Pinus pinaster	Plant	Biological	12	A	SH (STEM HEIGHT)	22.62	18.4361	10	37.7654	13.56	20.9343	10	48.6938	-0.51171	0.304768
8	196	Stanbury	south-west of Western Australia	2018	Pinus pinaster	Plant	Biological	60	A	SH (STEM HEIGHT)	22.62	18.4361	10	37.7654	18.25	7.84245	10	6.83378	-0.214669	0.0848943
8	197	Stanbury	south-west of Western Australia	2018	Pinus pinaster	Plant	Biological	84	B	SH (STEM HEIGHT)	22.62	18.4361	10	37.7654	17	5.37587	10	3.21111	-0.285621	0.0764281
8	198	Stanbury	south-west of Western Australia	2018	Pinus pinaster	Plant	Biological	12	A	RW (ROOT WEIGHT DRY)	0.07	0.0948683	10	0.001	0.12	0.189737	10	0.004	0.538997	0.433673
8	199	Stanbury	south-west of Western Australia	2018	Pinus pinaster	Plant	Biological	60	A	RW (ROOT WEIGHT DRY)	0.07	0.0948683	10	0.001	0.05	0.0948683	10	0.001	-0.336472	0.543673
8	200	Stanbury	south-west of Western Australia	2018	Pinus pinaster	Plant	Biological	84	B	RW (ROOT WEIGHT DRY)	0.07	0.0948683	10	0.001	0.03	0.0316228	10	0.000111111	-0.847298	0.294785
8	201	Stanbury	south-west of Western Australia	2018	Pinus pinaster	Plant	Biological	12	A	SW (SHOOT WEIGHT DRY)	0.16	0.189737	10	0.004	0.18	0.126491	10	0.00177778	0.117783	0.190008
8	202	Stanbury	south-west of Western Australia	2018	Pinus pinaster	Plant	Biological	60	A	SW (SHOOT WEIGHT DRY)	0.16	0.189737	10	0.004	0.09	0.189737	10	0.004	-0.575364	0.585069
8	203	Stanbury	south-west of Western Australia	2018	Pinus pinaster	Plant	Biological	84	B	SW (SHOOT WEIGHT DRY)	0.16	0.189737	10	0.004	0.06	0	10	0	-0.980829	0.140625
8	204	Stanbury	south-west of Western Australia	2018	Pinus pinaster	Plant	Biological	12	A	TDW (TOTAL DRY WEIGHT)	0.23	0.126491	10	0.00177778	0.3	0.126491	10	0.00177778	0.265703	0.0480235
8	205	Stanbury	south-west of Western Australia	2018	Pinus pinaster	Plant	Biological	60	A	TDW (TOTAL DRY WEIGHT)	0.23	0.126491	10	0.00177778	0.14	0.126491	10	0.00177778	-0.496437	0.111878
8	206	Stanbury	south-west of Western Australia	2018	Pinus pinaster	Plant	Biological	84	B	TDW (TOTAL DRY WEIGHT)	0.23	0.126491	10	0.00177778	0.1	0	10	0	-0.832909	0.0302457
8	207	Stanbury	south-west of Western Australia	2018	Pinus pinaster	Plant	Biological	12	A	LMR (LEAF MASS RATIO)	0.61	0.126491	10	0.00177778	0.55	0.252982	10	0.00711111	-0.103541	0.0254569
8	208	Stanbury	south-west of Western Australia	2018	Pinus pinaster	Plant	Biological	60	A	LMR (LEAF MASS RATIO)	0.61	0.126491	10	0.00177778	0.56	0.158114	10	0.00277778	-0.0855222	0.0122719
8	209	Stanbury	south-west of Western Australia	2018	Pinus pinaster	Plant	Biological	84	B	LMR (LEAF MASS RATIO)	0.61	0.126491	10	0.00177778	0.54	0.158114	10	0.00277778	-0.12189	0.0128733
8	210	Stanbury	south-west of Western Australia	2018	Pinus pinaster	Plant	Biological	12	A	R:S (ROOT TO SHOOT RATIO)	0.3	0.0948683	10	0.001	0.39	0.284605	10	0.009	0.262364	0.0632544
8	211	Stanbury	south-west of Western Australia	2018	Pinus pinaster	Plant	Biological	60	A	R:S (ROOT TO SHOOT RATIO)	0.3	0.0948683	10	0.001	0.36	0.126491	10	0.00177778	0.182322	0.0223457
8	212	Stanbury	south-west of Western Australia	2018	Pinus pinaster	Plant	Biological	84	B	R:S (ROOT TO SHOOT RATIO)	0.3	0.0948683	10	0.001	0.36	0.0948683	10	0.001	0.182322	0.0169444
8	213	Stanbury	south-west of Western Australia	2018	Pinus pinaster	Plant	Biological	12	A	L.A (LEAF AREA)	20.45	34.1526	10	129.6	37.18	74.4084	10	615.179	0.597788	0.679429
8	214	Stanbury	south-west of Western Australia	2018	Pinus pinaster	Plant	Biological	60	A	L.A (LEAF AREA)	20.45	34.1526	10	129.6	22.6	0	10	0	0.099967	0.278908
8	215	Stanbury	south-west of Western Australia	2018	Pinus pinaster	Plant	Biological	84	B	L.A (LEAF AREA)	20.45	34.1526	10	129.6	33.22	46.3274	10	238.469	0.485169	0.473388
8	216	Stanbury	south-west of Western Australia	2018	Pinus pinaster	Plant	Biological	12	A	SH (STEM HEIGHT)	53.5	24.0966	10	64.516	74.93	33.9945	10	128.403	0.336873	0.0408691
8	217	Stanbury	south-west of Western Australia	2018	Pinus pinaster	Plant	Biological	60	A	SH (STEM HEIGHT)	53.5	24.0966	10	64.516	54	0	10	0	0.00930239	0.0202863
8	218	Stanbury	south-west of Western Australia	2018	Pinus pinaster	Plant	Biological	84	B	SH (STEM HEIGHT)	53.5	24.0966	10	64.516	60.63	56.7945	10	358.402	0.125108	0.108034
8	219	Stanbury	south-west of Western Australia	2018	Pinus pinaster	Plant	Biological	12	A	RW (ROOT WEIGHT DRY)	0.43	0.695701	10	0.0537778	1.62	2.59307	10	0.747111	1.3264	0.517974
8	220	Stanbury	south-west of Western Australia	2018	Pinus pinaster	Plant	Biological	60	A	RW (ROOT WEIGHT DRY)	0.43	0.695701	10	0.0537778	0.3	0	10	0	-0.360003	0.261763
8	221	Stanbury	south-west of Western Australia	2018	Pinus pinaster	Plant	Biological	84	B	RW (ROOT WEIGHT DRY)	0.43	0.695701	10	0.0537778	0.74	1.1068	10	0.136111	0.542865	0.485467
8	222	Stanbury	south-west of Western Australia	2018	Pinus pinaster	Plant	Biological	12	A	SW (SHOOT WEIGHT DRY)	0.31	0.474342	10	0.025	0.69	1.35978	10	0.205444	0.800119	0.622495
8	223	Stanbury	south-west of Western Australia	2018	Pinus pinaster	Plant	Biological	60	A	SW (SHOOT WEIGHT DRY)	0.31	0.474342	10	0.025	0.35	0	10	0	0.121361	0.234131
8	224	Stanbury	south-west of Western Australia	2018	Pinus pinaster	Plant	Biological	84	B	SW (SHOOT WEIGHT DRY)	0.31	0.474342	10	0.025	0.47	0.664078	10	0.049	0.41616	0.433769
8	225	Stanbury	south-west of Western Australia	2018	Pinus pinaster	Plant	Biological	12	A	TDW (TOTAL DRY WEIGHT)	0.74	0.474342	10	0.025	2.31	1.3914	10	0.215111	1.13835	0.0773696
8	226	Stanbury	south-west of Western Australia	2018	Pinus pinaster	Plant	Biological	60	A	TDW (TOTAL DRY WEIGHT)	0.74	0.474342	10	0.025	0.64	0	10	0	-0.145182	0.0410884
8	227	Stanbury	south-west of Western Australia	2018	Pinus pinaster	Plant	Biological	84	B	TDW (TOTAL DRY WEIGHT)	0.74	0.474342	10	0.025	1.21	0.790569	10	0.0694444	0.491725	0.0837767
8	228	Stanbury	south-west of Western Australia	2018	Pinus pinaster	Plant	Biological	12	A	LAR (LEAF AREA RATIO)	0.04	0.0316228	10	0.000111111	0.08	0.158114	10	0.00277778	0.693147	0.453125
8	229	Stanbury	south-west of Western Australia	2018	Pinus pinaster	Plant	Biological	60	A	LAR (LEAF AREA RATIO)	0.04	0.0316228	10	0.000111111	0.03	0	10	0	-0.287682	0.0625
8	230	Stanbury	south-west of Western Australia	2018	Pinus pinaster	Plant	Biological	84	B	LAR (LEAF AREA RATIO)	0.04	0.0316228	10	0.000111111	0.04	0.0316228	10	0.000111111	0	0.125
8	231	Stanbury	south-west of Western Australia	2018	Pinus pinaster	Plant	Biological	12	A	LMR (LEAF MASS RATIO)	0.27	0.284605	10	0.009	0.2	0.284605	10	0.009	-0.300105	0.313611
8	232	Stanbury	south-west of Western Australia	2018	Pinus pinaster	Plant	Biological	60	A	LMR (LEAF MASS RATIO)	0.27	0.284605	10	0.009	0.37	0	10	0	0.315081	0.111111
8	233	Stanbury	south-west of Western Australia	2018	Pinus pinaster	Plant	Biological	84	B	LMR (LEAF MASS RATIO)	0.27	0.284605	10	0.009	0.26	0.126491	10	0.00177778	-0.0377403	0.13478
8	234	Stanbury	south-west of Western Australia	2018	Pinus pinaster	Plant	Biological	12	A	R:S (ROOT TO SHOOT RATIO)	0.58	0.252982	10	0.00711111	0.69	0.442719	10	0.0217778	0.173663	0.0601928
8	235	Stanbury	south-west of Western Australia	2018	Pinus pinaster	Plant	Biological	60	A	R:S (ROOT TO SHOOT RATIO)	0.58	0.252982	10	0.00711111	0.46	0	10	0	-0.231802	0.019025
8	236	Stanbury	south-west of Western Australia	2018	Pinus pinaster	Plant	Biological	84	B	R:S (ROOT TO SHOOT RATIO)	0.58	0.252982	10	0.00711111	0.6	0.189737	10	0.004	0.0339016	0.029025
8	237	Stanbury	south-west of Western Australia	2018	Pinus pinaster	Plant	Biological	12	A	L.A (LEAF AREA)	70.75	27.0691	10	81.4151	81.32	34.9115	10	135.424	0.139239	0.0330692
8	238	Stanbury	south-west of Western Australia	2018	Pinus pinaster	Plant	Biological	60	A	L.A (LEAF AREA)	70.75	27.0691	10	81.4151	140.52	289.918	10	9339.14	0.686197	0.440308
8	239	Stanbury	south-west of Western Australia	2018	Pinus pinaster	Plant	Biological	84	B	L.A (LEAF AREA)	70.75	27.0691	10	81.4151	66.26	60.6525	10	408.747	-0.0655661	0.0984288
8	240	Stanbury	south-west of Western Australia	2018	Pinus pinaster	Plant	Biological	12	A	SH (STEM HEIGHT)	166	42.0899	10	196.84	158.62	70.4872	10	552.049	-0.0454764	0.0261761
8	241	Stanbury	south-west of Western Australia	2018	Pinus pinaster	Plant	Biological	60	A	SH (STEM HEIGHT)	166	42.0899	10	196.84	192.2	141.196	10	2215.14	0.146549	0.0603969
8	242	Stanbury	south-west of Western Australia	2018	Pinus pinaster	Plant	Biological	84	B	SH (STEM HEIGHT)	166	42.0899	10	196.84	161.35	62.455	10	433.403	-0.0284119	0.0214119
8	243	Stanbury	south-west of Western Australia	2018	Pinus pinaster	Plant	Biological	12	A	RW (ROOT WEIGHT DRY)	0.63	19.701	10	43.1254	0.99	0.600833	10	0.0401111	0.451985	97.827
8	244	Stanbury	south-west of Western Australia	2018	Pinus pinaster	Plant	Biological	60	A	RW (ROOT WEIGHT DRY)	0.63	19.701	10	43.1254	1.71	4.01609	10	1.79211	0.998529	98.3417
8	245	Stanbury	south-west of Western Australia	2018	Pinus pinaster	Plant	Biological	84	B	RW (ROOT WEIGHT DRY)	0.63	19.701	10	43.1254	0.63	1.20167	10	0.160444	0	98.1539
8	246	Stanbury	south-west of Western Australia	2018	Pinus pinaster	Plant	Biological	12	A	SW (SHOOT WEIGHT DRY)	1.35	0.442719	10	0.0217778	1.55	0.790569	10	0.0694444	0.13815	0.036769
8	247	Stanbury	south-west of Western Australia	2018	Pinus pinaster	Plant	Biological	60	A	SW (SHOOT WEIGHT DRY)	1.35	0.442719	10	0.0217778	2.67	5.94508	10	3.92711	0.681974	0.506539
8	248	Stanbury	south-west of Western Australia	2018	Pinus pinaster	Plant	Biological	84	B	SW (SHOOT WEIGHT DRY)	1.35	0.442719	10	0.0217778	1.26	0.727324	10	0.0587778	-0.0689929	0.0440752
8	249	Stanbury	south-west of Western Australia	2018	Pinus pinaster	Plant	Biological	12	A	TDW (TOTAL DRY WEIGHT)	1.98	0.505964	10	0.0284444	2.54	0.600833	10	0.0401111	0.249067	0.0121255
8	250	Stanbury	south-west of Western Australia	2018	Pinus pinaster	Plant	Biological	60	A	TDW (TOTAL DRY WEIGHT)	1.98	0.505964	10	0.0284444	4.38	4.23745	10	1.99511	0.793952	0.100127
8	251	Stanbury	south-west of Western Australia	2018	Pinus pinaster	Plant	Biological	84	B	TDW (TOTAL DRY WEIGHT)	1.98	0.505964	10	0.0284444	1.88	0.56921	10	0.036	-0.0518251	0.015697
8	252	Stanbury	south-west of Western Australia	2018	Pinus pinaster	Plant	Biological	12	A	SLA (SPECIFIC LEAF AREA)	0.02	0.158114	10	0.00277778	0.02	0	10	0	0	6.25
8	253	Stanbury	south-west of Western Australia	2018	Pinus pinaster	Plant	Biological	60	A	SLA (SPECIFIC LEAF AREA)	0.02	0.158114	10	0.00277778	0.02	0	10	0	0	6.25
8	254	Stanbury	south-west of Western Australia	2018	Pinus pinaster	Plant	Biological	84	B	SLA (SPECIFIC LEAF AREA)	0.02	0.158114	10	0.00277778	0.02	0	10	0	0	6.25
8	255	Stanbury	south-west of Western Australia	2018	Pinus pinaster	Plant	Biological	84	B	LAR (LEAF AREA RATIO)	0.03	0	10	0	0.03	0.0316228	10	0.000111111	0	0.111111
8	256	Stanbury	south-west of Western Australia	2018	Pinus pinaster	Plant	Biological	12	A	LMR (LEAF MASS RATIO)	0.53	0.158114	10	0.00277778	0.49	0.0316228	10	0.000111111	-0.0784716	0.00931646
8	257	Stanbury	south-west of Western Australia	2018	Pinus pinaster	Plant	Biological	60	A	LMR (LEAF MASS RATIO)	0.53	0.158114	10	0.00277778	0.49	0.158114	10	0.00277778	-0.0784716	0.0193123
8	258	Stanbury	south-west of Western Australia	2018	Pinus pinaster	Plant	Biological	84	B	LMR (LEAF MASS RATIO)	0.53	0.158114	10	0.00277778	0.53	0.316228	10	0.0111111	0	0.0444998
8	259	Stanbury	south-west of Western Australia	2018	Pinus pinaster	Plant	Biological	12	A	R:S (ROOT TO SHOOT RATIO)	0.31	0.158114	10	0.00277778	0.39	0.0632456	10	0.000444444	0.229574	0.0286444
8	260	Stanbury	south-west of Western Australia	2018	Pinus pinaster	Plant	Biological	60	A	R:S (ROOT TO SHOOT RATIO)	0.31	0.158114	10	0.00277778	0.38	0.158114	10	0.00277778	0.203599	0.0433276
8	261	Stanbury	south-west of Western Australia	2018	Pinus pinaster	Plant	Biological	84	B	R:S (ROOT TO SHOOT RATIO)	0.31	0.158114	10	0.00277778	0.32	0.379473	10	0.016	0.0317487	0.16664
8	262	Stanbury	south-west of Western Australia	2018	Pinus pinaster	Plant	Biological	12	A	L.A (LEAF AREA)	1.14	1.1068	10	0.136111	1.09	0.790569	10	0.0694444	-0.0448506	0.146865
8	263	Stanbury	south-west of Western Australia	2018	Pinus pinaster	Plant	Biological	60	A	L.A (LEAF AREA)	1.14	1.1068	10	0.136111	5.91	18.6258	10	38.5468	1.64562	1.0875
8	264	Stanbury	south-west of Western Australia	2018	Pinus pinaster	Plant	Biological	84	B	L.A (LEAF AREA)	1.14	1.1068	10	0.136111	0.94	0.442719	10	0.0217778	-0.192904	0.116442
8	265	Stanbury	south-west of Western Australia	2018	Pinus pinaster	Plant	Biological	12	A	SH (STEM HEIGHT)	28.66	15.3054	10	26.0284	28.69	12.3013	10	16.8134	0.00104621	0.0469032
8	266	Stanbury	south-west of Western Australia	2018	Pinus pinaster	Plant	Biological	60	A	SH (STEM HEIGHT)	28.66	15.3054	10	26.0284	75.13	143.947	10	2302.3	0.963718	0.395614
8	267	Stanbury	south-west of Western Australia	2018	Pinus pinaster	Plant	Biological	84	B	SH (STEM HEIGHT)	28.66	15.3054	10	26.0284	28.75	11.0363	10	13.5334	0.00313534	0.0432551
8	268	Stanbury	south-west of Western Australia	2018	Pinus pinaster	Plant	Biological	60	A	SW (SHOOT WEIGHT DRY)	0.01	0	10	0	0.07	0.221359	10	0.00544444	1.94591	1
8	269	Stanbury	south-west of Western Australia	2018	Pinus pinaster	Plant	Biological	60	A	TDW (TOTAL DRY WEIGHT)	0.01	0	10	0	0.1	0.126491	10	0.00177778	2.30259	0.16
8	270	Stanbury	south-west of Western Australia	2018	Pinus pinaster	Plant	Biological	12	A	LMR (LEAF MASS RATIO)	0.58	0.158114	10	0.00277778	0.56	0.189737	10	0.004	-0.0350913	0.0189112
8	271	Stanbury	south-west of Western Australia	2018	Pinus pinaster	Plant	Biological	60	A	LMR (LEAF MASS RATIO)	0.58	0.158114	10	0.00277778	0.62	0.126491	10	0.00177778	0.0666914	0.011594
8	272	Stanbury	south-west of Western Australia	2018	Pinus pinaster	Plant	Biological	84	B	LMR (LEAF MASS RATIO)	0.58	0.158114	10	0.00277778	0.61	0.0948683	10	0.001	0.0504309	0.00985033
8	273	Stanbury	south-west of Western Australia	2018	Pinus pinaster	Plant	Biological	12	A	R:S (ROOT TO SHOOT RATIO)	0.27	0.158114	10	0.00277778	0.29	0.158114	10	0.00277778	0.071459	0.0640201
8	274	Stanbury	south-west of Western Australia	2018	Pinus pinaster	Plant	Biological	60	A	R:S (ROOT TO SHOOT RATIO)	0.27	0.158114	10	0.00277778	0.23	0.158114	10	0.00277778	-0.160343	0.0815525
8	275	Stanbury	south-west of Western Australia	2018	Pinus pinaster	Plant	Biological	84	B	R:S (ROOT TO SHOOT RATIO)	0.27	0.158114	10	0.00277778	0.23	0.0948683	10	0.001	-0.160343	0.0513068
8	276	Stanbury	south-west of Western Australia	2018	Pinus pinaster	Plant	Biological	12	A	L.A (LEAF AREA)	34.4	15.5584	10	26.896	73.15	38.3584	10	163.485	0.754456	0.0479531
8	277	Stanbury	south-west of Western Australia	2018	Pinus pinaster	Plant	Biological	60	A	L.A (LEAF AREA)	34.4	15.5584	10	26.896	67.74	65.5856	10	477.942	0.67762	0.114196
8	278	Stanbury	south-west of Western Australia	2018	Pinus pinaster	Plant	Biological	84	B	L.A (LEAF AREA)	34.4	15.5584	10	26.896	33.6	16.9814	10	32.041	-0.0235305	0.0459985
8	279	Stanbury	south-west of Western Australia	2018	Pinus pinaster	Plant	Biological	12	A	SH (STEM HEIGHT)	50.1	26.2785	10	76.729	112.3	106.063	10	1249.92	0.807153	0.116713
8	280	Stanbury	south-west of Western Australia	2018	Pinus pinaster	Plant	Biological	60	A	SH (STEM HEIGHT)	50.1	26.2785	10	76.729	86.63	94.0145	10	982.081	0.547625	0.145287
8	281	Stanbury	south-west of Western Australia	2018	Pinus pinaster	Plant	Biological	84	B	SH (STEM HEIGHT)	50.1	26.2785	10	76.729	50.4	43.0702	10	206.116	0.00597017	0.100541
8	282	Stanbury	south-west of Western Australia	2018	Pinus pinaster	Plant	Biological	12	A	RW (ROOT WEIGHT DRY)	1.54	1.89737	10	0.4	0.57	0.252982	10	0.00711111	-0.993901	0.171495
8	283	Stanbury	south-west of Western Australia	2018	Pinus pinaster	Plant	Biological	60	A	RW (ROOT WEIGHT DRY)	1.54	1.89737	10	0.4	0.9	1.58114	10	0.277778	-0.537143	0.460438
8	284	Stanbury	south-west of Western Australia	2018	Pinus pinaster	Plant	Biological	84	B	RW (ROOT WEIGHT DRY)	1.54	1.89737	10	0.4	1.66	2.43495	10	0.658778	0.0750352	0.366958
8	285	Stanbury	south-west of Western Australia	2018	Pinus pinaster	Plant	Biological	12	A	SW (SHOOT WEIGHT DRY)	0.8	0.252982	10	0.00711111	1.57	0.695701	10	0.0537778	0.674219	0.0296357
8	286	Stanbury	south-west of Western Australia	2018	Pinus pinaster	Plant	Biological	60	A	SW (SHOOT WEIGHT DRY)	0.8	0.252982	10	0.00711111	1.51	1.45465	10	0.235111	0.635253	0.102803
8	287	Stanbury	south-west of Western Australia	2018	Pinus pinaster	Plant	Biological	84	B	SW (SHOOT WEIGHT DRY)	0.8	0.252982	10	0.00711111	0.73	0.411096	10	0.0187778	-0.0915672	0.0417133
8	288	Stanbury	south-west of Western Australia	2018	Pinus pinaster	Plant	Biological	12	A	TDW (TOTAL DRY WEIGHT)	2.14	0.822192	10	0.0751111	2.33	0.411096	10	0.0187778	0.0850624	0.0178741
8	289	Stanbury	south-west of Western Australia	2018	Pinus pinaster	Plant	Biological	60	A	TDW (TOTAL DRY WEIGHT)	2.14	0.822192	10	0.0751111	2.41	0.885438	10	0.0871111	0.118821	0.0282595
8	290	Stanbury	south-west of Western Australia	2018	Pinus pinaster	Plant	Biological	84	B	TDW (TOTAL DRY WEIGHT)	2.14	0.822192	10	0.0751111	2.38	1.17004	10	0.152111	0.106295	0.0389296
8	291	Stanbury	south-west of Western Australia	2018	Pinus pinaster	Plant	Biological	12	A	LAR (LEAF AREA RATIO)	0.07	0.0632456	10	0.000444444	0.03	0	10	0	-0.847298	0.0816327
8	292	Stanbury	south-west of Western Australia	2018	Pinus pinaster	Plant	Biological	60	A	LAR (LEAF AREA RATIO)	0.07	0.0632456	10	0.000444444	0.04	0.0316228	10	0.000111111	-0.559616	0.144133
8	293	Stanbury	south-west of Western Australia	2018	Pinus pinaster	Plant	Biological	84	B	LAR (LEAF AREA RATIO)	0.07	0.0632456	10	0.000444444	0.07	0.0632456	10	0.000444444	0	0.163265
8	294	Stanbury	south-west of Western Australia	2018	Pinus pinaster	Plant	Biological	12	A	LMR (LEAF MASS RATIO)	0.33	0.284605	10	0.009	0.66	0.316228	10	0.0111111	0.693147	0.097337
8	295	Stanbury	south-west of Western Australia	2018	Pinus pinaster	Plant	Biological	60	A	LMR (LEAF MASS RATIO)	0.33	0.284605	10	0.009	0.59	0.411096	10	0.0187778	0.58103	0.122929
8	296	Stanbury	south-west of Western Australia	2018	Pinus pinaster	Plant	Biological	84	B	LMR (LEAF MASS RATIO)	0.33	0.284605	10	0.009	0.3	0.284605	10	0.009	-0.0953102	0.16438
8	297	Stanbury	south-west of Western Australia	2018	Pinus pinaster	Plant	Biological	12	A	R:S (ROOT TO SHOOT RATIO)	0.64	0.316228	10	0.0111111	0.27	0.0316228	10	0.000111111	-0.863046	0.0257858
8	298	Stanbury	south-west of Western Australia	2018	Pinus pinaster	Plant	Biological	60	A	R:S (ROOT TO SHOOT RATIO)	0.64	0.316228	10	0.0111111	0.36	0.442719	10	0.0217778	-0.575364	0.175649
8	299	Stanbury	south-west of Western Australia	2018	Pinus pinaster	Plant	Biological	84	B	R:S (ROOT TO SHOOT RATIO)	0.64	0.316228	10	0.0111111	0.67	0.316228	10	0.0111111	0.0458095	0.0466907
8	300	Stanbury	south-west of Western Australia	2018	Pinus pinaster	Plant	Biological	12	A	L.A (LEAF AREA)	59.89	56.668	10	356.807	64.52	63.1823	10	443.556	0.0744657	0.185426
8	301	Stanbury	south-west of Western Australia	2018	Pinus pinaster	Plant	Biological	60	A	L.A (LEAF AREA)	59.89	56.668	10	356.807	78	70.4239	10	551.059	0.264199	0.171047
8	302	Stanbury	south-west of Western Australia	2018	Pinus pinaster	Plant	Biological	84	B	L.A (LEAF AREA)	59.89	56.668	10	356.807	55.04	66.6924	10	494.209	-0.0844494	0.236354
8	303	Stanbury	south-west of Western Australia	2018	Pinus pinaster	Plant	Biological	12	A	SH (STEM HEIGHT)	43.95	46.106	10	236.196	58	73.523	10	600.625	0.27739	0.270742
8	304	Stanbury	south-west of Western Australia	2018	Pinus pinaster	Plant	Biological	60	A	SH (STEM HEIGHT)	43.95	46.106	10	236.196	48.9	43.007	10	205.511	0.106725	0.187402
8	305	Stanbury	south-west of Western Australia	2018	Pinus pinaster	Plant	Biological	84	B	SH (STEM HEIGHT)	43.95	46.106	10	236.196	38.75	38.2319	10	162.409	-0.125922	0.207396
8	306	Stanbury	south-west of Western Australia	2018	Pinus pinaster	Plant	Biological	12	A	RW (ROOT WEIGHT DRY)	1.29	1.51789	10	0.256	0.82	1.13842	10	0.144	-0.453093	0.331196
8	307	Stanbury	south-west of Western Australia	2018	Pinus pinaster	Plant	Biological	60	A	RW (ROOT WEIGHT DRY)	1.29	1.51789	10	0.256	1.03	1.48627	10	0.245444	-0.225083	0.346673
8	308	Stanbury	south-west of Western Australia	2018	Pinus pinaster	Plant	Biological	84	B	RW (ROOT WEIGHT DRY)	1.29	1.51789	10	0.256	1.37	2.18197	10	0.529	0.0601685	0.392116
8	309	Stanbury	south-west of Western Australia	2018	Pinus pinaster	Plant	Biological	12	A	SW (SHOOT WEIGHT DRY)	1.14	1.1068	10	0.136111	1.15	0.948683	10	0.1	0.00873368	0.162313
8	310	Stanbury	south-west of Western Australia	2018	Pinus pinaster	Plant	Biological	60	A	SW (SHOOT WEIGHT DRY)	1.14	1.1068	10	0.136111	1.4	1.20167	10	0.160444	0.205444	0.167933
8	311	Stanbury	south-west of Western Australia	2018	Pinus pinaster	Plant	Biological	84	B	SW (SHOOT WEIGHT DRY)	1.14	1.1068	10	0.136111	1.04	1.23329	10	0.169	-0.0918075	0.234885
8	312	Stanbury	south-west of Western Australia	2018	Pinus pinaster	Plant	Biological	12	A	TDW (TOTAL DRY WEIGHT)	2.44	0.600833	10	0.0401111	1.97	0.126491	10	0.00177778	-0.213964	0.00647583
8	313	Stanbury	south-west of Western Australia	2018	Pinus pinaster	Plant	Biological	60	A	TDW (TOTAL DRY WEIGHT)	2.44	0.600833	10	0.0401111	2.42	0.189737	10	0.004	-0.0082305	0.00667827
8	314	Stanbury	south-west of Western Australia	2018	Pinus pinaster	Plant	Biological	84	B	TDW (TOTAL DRY WEIGHT)	2.44	0.600833	10	0.0401111	2.41	0.822192	10	0.0751111	-0.0123713	0.0177025
8	315	Stanbury	south-west of Western Australia	2018	Pinus pinaster	Plant	Biological	12	A	LAR (LEAF AREA RATIO)	0.04	0.0316228	10	0.000111111	0.04	0.284605	10	0.009	0	5.125
8	316	Stanbury	south-west of Western Australia	2018	Pinus pinaster	Plant	Biological	60	A	LAR (LEAF AREA RATIO)	0.04	0.0316228	10	0.000111111	0.04	0.0632456	10	0.000444444	0	0.3125
8	317	Stanbury	south-west of Western Australia	2018	Pinus pinaster	Plant	Biological	84	B	LAR (LEAF AREA RATIO)	0.04	0.0316228	10	0.000111111	0.05	0.0632456	10	0.000444444	0.223144	0.2225
8	318	Stanbury	south-west of Western Australia	2018	Pinus pinaster	Plant	Biological	12	A	LMR (LEAF MASS RATIO)	0.44	0.474342	10	0.025	0.53	0.474342	10	0.025	0.186102	0.196319
8	319	Stanbury	south-west of Western Australia	2018	Pinus pinaster	Plant	Biological	60	A	LMR (LEAF MASS RATIO)	0.44	0.474342	10	0.025	0.53	0.505964	10	0.0284444	0.186102	0.207355
8	320	Stanbury	south-west of Western Australia	2018	Pinus pinaster	Plant	Biological	84	B	LMR (LEAF MASS RATIO)	0.44	0.474342	10	0.025	0.41	0.537587	10	0.0321111	-0.0706176	0.28814
8	321	Stanbury	south-west of Western Australia	2018	Pinus pinaster	Plant	Biological	12	A	R:S (ROOT TO SHOOT RATIO)	0.52	0.537587	10	0.0321111	0.41	0.505964	10	0.0284444	-0.237672	0.259169
8	322	Stanbury	south-west of Western Australia	2018	Pinus pinaster	Plant	Biological	60	A	R:S (ROOT TO SHOOT RATIO)	0.52	0.537587	10	0.0321111	0.42	0.537587	10	0.0321111	-0.213574	0.270711
8	323	Stanbury	south-west of Western Australia	2018	Pinus pinaster	Plant	Biological	84	B	R:S (ROOT TO SHOOT RATIO)	0.52	0.537587	10	0.0321111	0.55	0.600833	10	0.0401111	0.0560895	0.226218
8	324	Stanbury	south-west of Western Australia	2018	Pinus pinaster	Plant	Biological	12	A	L.A (LEAF AREA)	17.37	2.59307	10	0.747111	15.71	7.24162	10	5.82678	-0.100447	0.0234766
8	325	Stanbury	south-west of Western Australia	2018	Pinus pinaster	Plant	Biological	60	A	L.A (LEAF AREA)	17.37	2.59307	10	0.747111	16.67	5.47074	10	3.32544	-0.0411339	0.0129987
8	326	Stanbury	south-west of Western Australia	2018	Pinus pinaster	Plant	Biological	84	B	L.A (LEAF AREA)	17.37	2.59307	10	0.747111	16.33	3.03579	10	1.024	-0.0617407	0.00568455
8	327	Stanbury	south-west of Western Australia	2018	Pinus pinaster	Plant	Biological	12	A	SH (STEM HEIGHT)	76.9	42.4694	10	200.405	74.55	24.982	10	69.3444	-0.0310358	0.0417294
8	328	Stanbury	south-west of Western Australia	2018	Pinus pinaster	Plant	Biological	60	A	SH (STEM HEIGHT)	76.9	42.4694	10	200.405	77.25	28.2075	10	88.4071	0.00454104	0.0438331
8	329	Stanbury	south-west of Western Australia	2018	Pinus pinaster	Plant	Biological	84	B	SH (STEM HEIGHT)	76.9	42.4694	10	200.405	81.4	31.2117	10	108.241	0.0568694	0.0452023
8	330	Stanbury	south-west of Western Australia	2018	Pinus pinaster	Plant	Biological	12	A	RW (ROOT WEIGHT DRY)	0.13	0.0632456	10	0.000444444	0.12	0.0632456	10	0.000444444	-0.0800427	0.0514464
8	331	Stanbury	south-west of Western Australia	2018	Pinus pinaster	Plant	Biological	60	A	RW (ROOT WEIGHT DRY)	0.13	0.0632456	10	0.000444444	0.16	0.0632456	10	0.000444444	0.207639	0.0392936
8	332	Stanbury	south-west of Western Australia	2018	Pinus pinaster	Plant	Biological	84	B	RW (ROOT WEIGHT DRY)	0.13	0.0632456	10	0.000444444	0.16	0.126491	10	0.00177778	0.207639	0.0861686
8	333	Stanbury	south-west of Western Australia	2018	Pinus pinaster	Plant	Biological	12	A	SW (SHOOT WEIGHT DRY)	0.44	0.126491	10	0.00177778	0.37	0.126491	10	0.00177778	-0.173272	0.0199518
8	334	Stanbury	south-west of Western Australia	2018	Pinus pinaster	Plant	Biological	60	A	SW (SHOOT WEIGHT DRY)	0.44	0.126491	10	0.00177778	0.46	0.284605	10	0.009	0.0444518	0.0465442
8	335	Stanbury	south-west of Western Australia	2018	Pinus pinaster	Plant	Biological	84	B	SW (SHOOT WEIGHT DRY)	0.44	0.126491	10	0.00177778	0.45	0.126491	10	0.00177778	0.0224729	0.0161657
8	336	Stanbury	south-west of Western Australia	2018	Pinus pinaster	Plant	Biological	12	A	TDW (TOTAL DRY WEIGHT)	0.57	0.0632456	10	0.000444444	0.48	0.0316228	10	0.000111111	-0.17185	0.00166518
8	337	Stanbury	south-west of Western Australia	2018	Pinus pinaster	Plant	Biological	60	A	TDW (TOTAL DRY WEIGHT)	0.57	0.0632456	10	0.000444444	0.62	0.0948683	10	0.001	0.0840831	0.00357246
8	338	Stanbury	south-west of Western Australia	2018	Pinus pinaster	Plant	Biological	84	B	TDW (TOTAL DRY WEIGHT)	0.57	0.0632456	10	0.000444444	0.6	0.0632456	10	0.000444444	0.0512933	0.00234226
8	339	Stanbury	south-west of Western Australia	2018	Pinus pinaster	Plant	Biological	12	A	LAR (LEAF AREA RATIO)	0.03	0	10	0	0.03	0.0316228	10	0.000111111	0	0.111111
8	340	Stanbury	south-west of Western Australia	2018	Pinus pinaster	Plant	Biological	12	A	LMR (LEAF MASS RATIO)	0.7	0.126491	10	0.00177778	0.68	0.158114	10	0.00277778	-0.0289875	0.00867188
8	341	Stanbury	south-west of Western Australia	2018	Pinus pinaster	Plant	Biological	60	A	LMR (LEAF MASS RATIO)	0.7	0.126491	10	0.00177778	0.67	0.158114	10	0.00277778	-0.0438026	0.00883448
8	342	Stanbury	south-west of Western Australia	2018	Pinus pinaster	Plant	Biological	84	B	LMR (LEAF MASS RATIO)	0.7	0.126491	10	0.00177778	0.66	0.158114	10	0.00277778	-0.0588405	0.00900452
8	343	Stanbury	south-west of Western Australia	2018	Pinus pinaster	Plant	Biological	12	A	R:S (ROOT TO SHOOT RATIO)	0.23	0.126491	10	0.00177778	0.25	0.158114	10	0.00277778	0.0833816	0.0702457
8	344	Stanbury	south-west of Western Australia	2018	Pinus pinaster	Plant	Biological	60	A	R:S (ROOT TO SHOOT RATIO)	0.23	0.126491	10	0.00177778	0.26	0.158114	10	0.00277778	0.122602	0.067228
8	345	Stanbury	south-west of Western Australia	2018	Pinus pinaster	Plant	Biological	84	B	R:S (ROOT TO SHOOT RATIO)	0.23	0.126491	10	0.00177778	0.26	0.189737	10	0.004	0.122602	0.0835002
9	346	Crocker	Ithaca, New York	2017	Phragmites australis (european lineage)	Plant	Biological	24	A	Proportion early seedling survival	0.53	0.212132	50	0.000918367	0.53	0.212132	50	0.000918367	0	0.00640797
9	347	Crocker	Ithaca, New York	2017	Phragmites australis (european lineage)	Plant	Biological	24	A	Proportion early seedling survival	0.67	0.212132	50	0.000918367	0.64	0.141421	50	0.000408163	-0.0458095	0.00298146
9	348	Crocker	Ithaca, New York	2017	Phragmites australis (european lineage)	Plant	Biological	24	A	Proportion early seedling survival	0.45	0.127279	50	0.000330612	0.43	0.141421	50	0.000408163	-0.0454624	0.00376333
9	349	Crocker	Ithaca, New York	2017	Phragmites australis (european lineage)	Plant	Biological	24	A	Proportion early seedling survival	0.148	0.127279	50	0.000330612	0.129	0.127279	50	0.000330612	-0.1374	0.0342618
9	350	Crocker	Ithaca, New York	2017	Phragmites australis (european lineage)	Plant	Biological	24	A	Proportion early seedling survival	0.74	0.190919	50	0.000743878	0.722	0.19799	50	0.0008	-0.024625	0.00283524
9	351	Crocker	Ithaca, New York	2017	Phragmites australis (european lineage)	Plant	Biological	24	A	Proportion early seedling survival	0.787	0.26163	50	0.00139694	0.814	0.127279	50	0.000330612	0.0337321	0.0026993
9	352	Crocker	Ithaca, New York	2017	Phragmites australis (european lineage)	Plant	Biological	24	A	Proportion early seedling survival	0.546	0.212132	50	0.000918367	0.527	0.26163	50	0.00139694	-0.0354184	0.00794822
9	353	Crocker	Ithaca, New York	2017	Phragmites australis (european lineage)	Plant	Biological	24	A	Proportion early seedling survival	0.227	0.26163	50	0.00139694	0.282	0.26163	50	0.00139694	0.216957	0.0437825
9	354	Crocker	Ithaca, New York	2017	Phragmites australis (european lineage)	Plant	Biological	24	A	Proportion early seedling survival	0.91	0.141421	50	0.000408163	0.936	0.127279	50	0.000330612	0.0281709	0.000852856
10	355	Maoela	Southafrica	2016	Acacia mearnsii	Plant	Biological	84	B	Mean percentage of leaves damaged	23.94	21.3	15	32.4064	42.38	43.72	15	136.531	0.571126	0.123723
10	356	Maoela	Southafrica	2016	Acacia mearnsii	Plant	Biological	84	B	Mean percentage of leaves damaged	6.055	22.367	15	35.7345	38.26	44.73	15	142.912	1.84352	1.00082
10	357	Maoela	Southafrica	2016	Acacia mearnsii	Plant	Biological	84	B	Mean percentage of leaves damaged	2.5	16.94	15	20.4974	6.875	19.36	15	26.7721	1.0116	3.5896
10	358	Maoela	Southafrica	2016	Acacia mearnsii	Plant	Biological	84	B	Mean percentage of leaves damaged	15	16.94	15	20.4974	23.125	16.94	15	20.4974	0.432864	0.120801
11	359	Kuebbing	Knoxville, Tennessee	2016	Lonicera mackii y Ligustrum sinense	Plant	Biological	3	A	Shoot mass	0.66	0.62	60	0.00651525	0.47	0.23	60	0.00089661	-0.339507	0.0186989
11	360	Kuebbing	Knoxville, Tennessee	2016	Lonicera mackii y Ligustrum sinense	Plant	Biological	3	A	Shoot mass	0.66	0.62	60	0.00651525	0.42	0.155	60	0.000407203	-0.451985	0.0169776
11	361	Kuebbing	Knoxville, Tennessee	2016	Lonicera mackii y Ligustrum sinense	Plant	Biological	3	A	Root mass	1.1	1.317	60	0.0293981	0.69	0.46	60	0.00358644	-0.466374	0.0312984
11	362	Kuebbing	Knoxville, Tennessee	2016	Lonicera mackii y Ligustrum sinense	Plant	Biological	3	A	Root mass	1.1	1.317	60	0.0293981	0.47	0.3	60	0.00152542	-0.850333	0.0306814
12	363	Shannon	-	2014	Lonicera mackii y Ligustrum sinense	Plant	Biological	4	A	aboveground biomass	6.23	1.29	45	0.0378205	7.2	1.72	45	0.0672364	0.144705	0.00222095
12	364	Shannon	-	2014	Lonicera mackii y Ligustrum sinense	Plant	Biological	4	A	aboveground biomass	3.98	1.06	45	0.0255364	3.76	0.65	45	0.00960227	-0.0568629	0.00224039
12	365	Shannon	-	2014	Lonicera mackii y Ligustrum sinense	Plant	Biological	4	A	aboveground biomass	4.84	1.28	45	0.0372364	4.51	1.52	45	0.0525091	-0.0706176	0.00407842
12	366	Shannon	-	2014	Lonicera mackii y Ligustrum sinense	Plant	Biological	4	A	aboveground biomass	2.47	0.62	45	0.00873636	2.04	0.64	45	0.00930909	-0.191268	0.00358735
12	367	Shannon	-	2014	Lonicera mackii y Ligustrum sinense	Plant	Biological	4	A	aboveground biomass	1.61	0.42	45	0.00400909	3.66	1.28	45	0.0372364	0.821229	0.00423026
12	368	Shannon	-	2014	Lonicera mackii y Ligustrum sinense	Plant	Biological	4	A	aboveground biomass	0.54	0.42	45	0.00400909	1.07	0.5	45	0.00568182	0.683845	0.0182955
12	369	Shannon	-	2014	Lonicera mackii y Ligustrum sinense	Plant	Biological	4	A	aboveground biomass	7.1	0.84	45	0.0160364	8.38	2.16	45	0.106036	0.165753	0.00178746
12	370	Shannon	-	2014	Lonicera mackii y Ligustrum sinense	Plant	Biological	4	A	aboveground biomass	4.94	0.92	45	0.0192364	4.84	2.12	45	0.102145	-0.0204506	0.00503426
12	371	Shannon	-	2014	Lonicera mackii y Ligustrum sinense	Plant	Biological	4	A	aboveground biomass	4.94	0.92	45	0.0192364	3.44	0.86	45	0.0168091	-0.361894	0.00215963
12	372	Shannon	-	2014	Lonicera mackii y Ligustrum sinense	Plant	Biological	4	A	aboveground biomass	2.15	0.5	45	0.00568182	2.04	0.92	45	0.0192364	-0.052518	0.00572148
12	373	Shannon	-	2014	Lonicera mackii y Ligustrum sinense	Plant	Biological	4	A	aboveground biomass	2.15	0.64	45	0.00930909	1.5	0.44	45	0.0044	-0.360003	0.00388121
12	374	Shannon	-	2014	Lonicera mackii y Ligustrum sinense	Plant	Biological	4	A	aboveground biomass	0.96	0.44	45	0.0044	1.72	0.86	45	0.0168091	0.583146	0.0102238
12	375	Shannon	-	2014	Lonicera mackii y Ligustrum sinense	Plant	Biological	4	A	aboveground biomass	6.45	1.08	45	0.0265091	5.27	1.94	45	0.0855364	-0.20205	0.00363445
12	376	Shannon	-	2014	Lonicera mackii y Ligustrum sinense	Plant	Biological	4	A	aboveground biomass	4.3	0.86	45	0.0168091	3.22	0.56	45	0.00712727	-0.289234	0.00156102
12	377	Shannon	-	2014	Lonicera mackii y Ligustrum sinense	Plant	Biological	4	A	aboveground biomass	4.73	1.08	45	0.0265091	4.95	1.3	45	0.0384091	0.0454624	0.00269127
12	378	Shannon	-	2014	Lonicera mackii y Ligustrum sinense	Plant	Biological	4	A	aboveground biomass	1.93	0.66	45	0.0099	3.01	1.08	45	0.0265091	0.44442	0.00545962
12	379	Shannon	-	2014	Lonicera mackii y Ligustrum sinense	Plant	Biological	4	A	aboveground biomass	2.15	0.44	45	0.0044	3.87	1.72	45	0.0672364	0.587787	0.00532029
12	380	Shannon	-	2014	Lonicera mackii y Ligustrum sinense	Plant	Biological	4	A	aboveground biomass	1.07	0.44	45	0.0044	0.75	0.22	45	0.0011	-0.355341	0.00566983
13	381	Rodriguez-Echeverria	Coimbra, Portugal (40° 12 ´50´´ N 82° 30´ 58´´W).	2013	Acacia dealbata	Plant	Biological	24	A	Aboveground biomass	2.7	0.632456	10	0.0444444	2.02	0.426907	10	0.02025	-0.290154	0.00995344
14	382	Rout	Fort Worth Prairie (32 840 N, 97 470 W)	2013	Sorghum halepense	Plant	Biological	5.33	A	Height	35.2	2.43245	8	0.845257	30	3.32057	8	1.57517	-0.159849	0.00212833
15	383	Grove	Washington	2012	Cytisus scoparius	Plant	Biological	360	B	Douglas-fir biomass	3.59	1.35554	15	0.13125	2.98	1.54919	15	0.171429	-0.186229	0.0275221
15	384	Grove	Washington	2012	Cytisus scoparius	Plant	Biological	360	B	Douglas-fir biomass	3.63	1.8203	15	0.236679	3.2	1.54919	15	0.171429	-0.126082	0.0323892
16	385	Elgersma	New Jersey	2012	Berberis thunbergii y Microstegium vimineum	Plant	Biological	34	A	Aboveground growth	3.52	2.90689	20	0.444737	7.43	5.2324	20	1.44095	0.747065	0.0588957
16	386	Elgersma	New Jersey	2012	Berberis thunbergii y Microstegium vimineum	Plant	Biological	34	A	Aboveground growth	3.52	2.90689	20	0.444737	2.6	3.48827	20	0.640421	-0.30295	0.124099
16	387	Elgersma	New Jersey	2012	Berberis thunbergii y Microstegium vimineum	Plant	Biological	34	A	Change in biomass	1.32	0.447214	20	0.0105263	2.33	1.02859	20	0.0556842	0.568237	0.0154834
16	388	Elgersma	New Jersey	2012	Berberis thunbergii y Microstegium vimineum	Plant	Biological	34	A	Change in biomass	1.32	0.447214	20	0.0105263	1.56	0.67082	20	0.0236842	0.167054	0.0149848
17	389	Meisner	Gelderse Poort region were obtained from Staatsbosbeheer regio Oost, the Netherlands.	2012	Artemisia biennis, Rorippa austriaca, y Senecio inaequidens	Plant	Biological	2.5	A	% germination rate	57.75	17.8352	10	35.344	64.78	22.3889	10	55.696	0.114874	0.0214829
17	390	Meisner	Gelderse Poort region were obtained from Staatsbosbeheer regio Oost, the Netherlands.	2012	Artemisia biennis, Rorippa austriaca, y Senecio inaequidens	Plant	Biological	2.5	A	% germination rate	73.24	17.8352	10	35.344	87.32	17.8036	10	35.2188	0.175838	0.0100872
17	391	Meisner	Gelderse Poort region were obtained from Staatsbosbeheer regio Oost, the Netherlands.	2012	Artemisia biennis, Rorippa austriaca, y Senecio inaequidens	Plant	Biological	2.5	A	% germination rate	69.01	22.1676	10	54.6001	60.56	8.91762	10	8.836	-0.130617	0.0124867
17	392	Meisner	Gelderse Poort region were obtained from Staatsbosbeheer regio Oost, the Netherlands.	2012	Artemisia biennis, Rorippa austriaca, y Senecio inaequidens	Plant	Biological	2.5	A	biomass	76.92	48.6358	10	262.827	200	48.6675	10	263.169	0.955551	0.0459005
17	393	Meisner	Gelderse Poort region were obtained from Staatsbosbeheer regio Oost, the Netherlands.	2012	Artemisia biennis, Rorippa austriaca, y Senecio inaequidens	Plant	Biological	2.5	A	biomass	584.6	194.575	10	4206.6	415.38	389.529	10	16859.2	-0.341734	0.0990184
17	394	Meisner	Gelderse Poort region were obtained from Staatsbosbeheer regio Oost, the Netherlands.	2012	Artemisia biennis, Rorippa austriaca, y Senecio inaequidens	Plant	Biological	2.5	A	biomass	538.46	389.213	10	16831.9	738.46	291.91	10	9467.93	0.315854	0.0678737
18	395	Vila	Menorca, Balearic Islands (40o05'39" and 38o38'25" N and 1o11'16" and 4o19'38" E).	2007	Oxalis pes-caprae	Plant	Biological	12	A	Seedlings/tray	146.8	108.329	8	1676.45	223.4	216.658	8	6705.78	0.419893	0.185637
18	396	Vila	Menorca, Balearic Islands (40o05'39" and 38o38'25" N and 1o11'16" and 4o19'38" E).	2007	Oxalis pes-caprae	Plant	Biological	12	A	Growth forms/tray	2.38	0.254558	8	0.00925714	3.19	0.254558	8	0.00925714	0.29292	0.00222597
19	397	Le Roux	Australia, Critically Endangered Cumberland Plain Woodland (CPW)	2024	Olea europaea	Plant	Biological	240	B	root to shoot	0.35	0.033	15	7.77857e-05	0.395	0.028	15	5.6e-05	0.120953	0.000927642
19	398	Le Roux	Australia, Critically Endangered Cumberland Plain Woodland (CPW)	2024	Olea europaea	Plant	Biological	240	B	root to shoot	0.314	0.0275	15	5.40179e-05	0.307	0.0125	15	1.11607e-05	-0.0225452	0.000621869
19	399	Le Roux	Australia, Critically Endangered Cumberland Plain Woodland (CPW)	2024	Olea europaea	Plant	Biological	240	B	nodule number	42.22	8.3325	15	4.95933	62.22	11.665	15	9.71944	0.387782	0.00493995
19	400	Le Roux	Australia, Critically Endangered Cumberland Plain Woodland (CPW)	2024	Olea europaea	Plant	Biological	240	B	nodule number	13.33	5	15	1.78571	35.56	7.78	15	4.32346	0.981204	0.0125708

## Sheet: plantperformance_metadata
Variable	Description
id_article	Internal observation id
id_obs	Internal article id
author	First auhor
location	Site of the study
year	Year of publication
inv_sp	Invasive species
plant_or_animal	Type of invasive species
leg_type	Type of legacy
duration	Duration of the legacy (in months)
short_or_long_term	Duration of the legacy: short-term:< 5 years ("A"); long-term: > 5 years ("B")
response_variable	Response associated with plant performance
control_mean	Control (uninvaded) mean
control_SD	Control (uninvaded) standard deviation
control_N	Control (uninvaded) sample size
control_VAR	Control (uninvaded) variance
response_mean	Response (after invasion) mean
response_SD	Response (after invasion) standard deviation
response_N	Response (after invasion) sample size
response_VAR	Response (after invasion) variance
lnRR	Effect size (expressed as ln-Response-Ratio)
var_ln	Variance of the effect size
