# Supplementary material
Source: Research Square preprint supplement (doi:10.21203/rs.3.rs-10244607/v1)
Supplement: Supplementary file 6 [file f77134002c732f713b8a9ecf.xlsx]

## Sheet: pH_data
id_article	id_obs	author	location	year	inv_sp	plant_or_animal	leg_type	duration	short_or_long_term	control_mean	control_SD	control_N	control_VAR	response_mean	response_SD	response_N	response_VAR	lnRR	var_ln
1	1	Parsons	Point Reyes National Seashore (PRNS), California	2021	Ammophila arenaria	Plant	Biogeochem	48	A	6.6	0.3	99	0.000918367	6.2	1	99	0.0102041	-0.0625204	0.000283643
1	2	Parsons	Point Reyes National Seashore (PRNS), California	2021	Ammophila arenaria	Plant	Biogeochem	48	A	6.6	0.3	99	0.000918367	6.9	0.4	99	0.00163265	0.0444518	5.48157e-05
1	3	Parsons	Point Reyes National Seashore (PRNS), California	2021	Ammophila arenaria	Plant	Biogeochem	48	A	5.9	0.4	99	0.00163265	6.2	1	99	0.0102041	0.0495969	0.000309202
1	4	Parsons	Point Reyes National Seashore (PRNS), California	2021	Ammophila arenaria	Plant	Biogeochem	48	A	5.9	0.4	99	0.00163265	6.9	0.4	99	0.00163265	0.156569	8.03739e-05
2	5	Ahmad	Kashmir Himalaya (32◦20′ to 34◦54′ N and 73◦55′ to 75◦35′ E)	2021	Leucanthemum vulgare	Plant	Biogeochem	2	A	6.8	0.83	10	0.0765444	7.19	0.99	10	0.1089	0.0557686	0.00338572
3	6	Anthony	New England, USA	2019	Alliaria petiolata	Plant	Biogeochem	12	A	4.9	0.17	24	0.00125652	5.3	0.14	24	0.000852174	0.0784716	7.92259e-05
3	7	Anthony	New England, USA	2019	Alliaria petiolata	Plant	Biogeochem	36	A	4.3	0.17	24	0.00125652	4.4	0.17	24	0.00125652	0.0229895	0.000127324
4	8	Stanbury	south-west of Western Australia	2018	Pinus pinaster	Plant	Biogeochem	12	A	5.2	0.353553	50	0.00255102	5.5	0.777817	50	0.0123469	0.0560895	0.000492456
4	9	Stanbury	south-west of Western Australia	2018	Pinus pinaster	Plant	Biogeochem	60	A	5.2	0.353553	50	0.00255102	5.5	1.27279	50	0.0330612	0.0560895	0.00116353
4	10	Stanbury	south-west of Western Australia	2018	Pinus pinaster	Plant	Biogeochem	84	B	5.2	0.353553	50	0.00255102	5.6	0.212132	50	0.000918367	0.074108	0.000121155
5	11	Fuselier	Kentucky Cherokee Park (388140 40.200N, 858410 42.7200W)	2018	Lonicera mackii	Plant	Biogeochem	72	B	6.2	1.96	96	0.0404379	6.4	2.94	96	0.0909853	0.0317487	0.0032392
6	12	Maclean	Scotland in Argyll, Kintyre and Lochaber, between 55°76′N and 56°90′N,	2017	Rhododendron ponticum	Plant	Biogeochem	120	B	4.48333	0.263717	6	0.0139093	4.28818	0.309542	11	0.00958164	-0.044504	0.00105036
6	13	Maclean	Scotland in Argyll, Kintyre and Lochaber, between 55°76′N and 56°90′N,	2017	Rhododendron ponticum	Plant	Biogeochem	180	B	4.48333	0.263717	6	0.0139093	4.38273	0.292715	11	0.00856818	-0.0226956	0.000982179
6	14	Maclean	Scotland in Argyll, Kintyre and Lochaber, between 55°76′N and 56°90′N,	2017	Rhododendron ponticum	Plant	Biogeochem	240	B	4.48333	0.263717	6	0.0139093	4.37333	2.39821	5	1.43786	-0.0248413	0.0607191
6	15	Maclean	Scotland in Argyll, Kintyre and Lochaber, between 55°76′N and 56°90′N,	2017	Rhododendron ponticum	Plant	Biogeochem	360	B	4.48333	0.263717	6	0.0139093	4.32	4.32	5	4.6656	-0.0371114	0.200577
7	16	Nsikani	Cape Flats Sand Fynbos (CFSF) of the Western Cape Province, South Africa	2017	Acacia saligna	Plant	Biogeochem	24	A	4.5	0	45	0	4.75	0.249	45	0.00140911	0.0540672	6.10659e-05
7	17	Nsikani	Cape Flats Sand Fynbos (CFSF) of the Western Cape Province, South Africa	2017	Acacia saligna	Plant	Biogeochem	72	B	3.94	0.31	45	0.00218409	4.81	0.44	45	0.0044	0.199516	0.000323521
7	18	Nsikani	Cape Flats Sand Fynbos (CFSF) of the Western Cape Province, South Africa	2017	Acacia saligna	Plant	Biogeochem	120	B	3.94	0.31	45	0.00218409	5.69	0.37	45	0.00311136	0.36753	0.000231533
8	19	Broadbent	St. James Conservation Area in the South Island of New Zealand (Lat. Long. = -42.460273, 172.830938; elevation = 800– 900 m.a.s.l)	2017	Cytisus scoparius	Plant	Biogeochem	72	B	4.9	0.06	4	0.0012	4.7	0.4	4	0.0533333	-0.0416727	0.00184826
9	20	Szitar	Kiskunság, Hungary.	2014	Pinus nigra and Pinus sylvestris	Plant	Biogeochem	60	A	7.9	2.05548	10	0.469444	8	0.0316228	10	0.000111111	0.0125788	0.00677131
9	21	Szitar	Kiskunság, Hungary.	2014	Pinus nigra and Pinus sylvestris	Plant	Biogeochem	60	A	8	0.126491	10	0.00177778	8	0.0948683	10	0.001	0	3.90625e-05
10	22	Dickie	Craigieburn Forest Park, Canterbury, New Zealand (4389′ 04′′S, 171843′ 52′′E)	2014	Pinus contorta	Plant	Biogeochem	36	A	5.2	0.031	6	0.0001922	5	0.12	5	0.0036	-0.0392207	0.000121123
11	23	Hagan	Croom Tract of Withlacoochee State Forest in Hernando County, Florida (28°36´19.99´´N, 82°16´19.73´´W).	2013	Imperata cylindrica	Plant	Biogeochem	36	A	5.4	0.207846	12	0.00392727	5.46	0.221359	10	0.00544444	0.0110498	0.000287822
11	24	Hagan	Croom Tract of Withlacoochee State Forest in Hernando County, Florida (28°36´19.99´´N, 82°16´19.73´´W).	2013	Imperata cylindrica	Plant	Biogeochem	60	A	5.4	0.207846	12	0.00392727	5.62	0.232164	11	0.00539	0.0399327	0.000278597
11	25	Hagan	Croom Tract of Withlacoochee State Forest in Hernando County, Florida (28°36´19.99´´N, 82°16´19.73´´W).	2013	Imperata cylindrica	Plant	Biogeochem	84	B	5.4	0.207846	12	0.00392727	5.46	0.242487	12	0.00534545	0.0110498	0.000287822
12	26	Grove	Washington	2012	Cytisus scoparius	Plant	Biogeochem	360	B	5.61	0.11225	14	0.000969231	5.49	0.149666	14	0.00172308	-0.0216225	8.16822e-05
12	27	Grove	Washington	2012	Cytisus scoparius	Plant	Biogeochem	360	B	5.14	0.11225	14	0.000969231	5.7	0.187083	14	0.00269231	0.103413	0.000111012
13	28	Jordan	North Dakota and Montana	2011	Bromus, Agropyron and Euphorbia	Plant	Biogeochem	3	A	8	0.05	4	0.000833333	7.8	0.07	4	0.00163333	-0.0253178	2.99004e-05
13	29	Jordan	North Dakota and Montana	2011	Bromus, Agropyron and Euphorbia	Plant	Biogeochem	3	A	7.9	0.1	4	0.00333333	7.7	0.11	4	0.00403333	-0.0256424	9.10781e-05
13	30	Jordan	North Dakota and Montana	2011	Bromus, Agropyron and Euphorbia	Plant	Biogeochem	3	A	7.9	0.1	4	0.00333333	7.9	0.22	4	0.0161333	0	0.000233937
13	31	Jordan	North Dakota and Montana	2011	Bromus, Agropyron and Euphorbia	Plant	Biogeochem	3	A	8	0.13	4	0.00563333	7.9	0.09	4	0.0027	-0.0125788	9.84623e-05
13	32	Jordan	North Dakota and Montana	2011	Bromus, Agropyron and Euphorbia	Plant	Biogeochem	3	A	8.4	0.06	4	0.0012	8.1	0.07	4	0.00163333	-0.0363676	3.1426e-05
13	33	Jordan	North Dakota and Montana	2011	Bromus, Agropyron and Euphorbia	Plant	Biogeochem	3	A	8.6	0.04	4	0.000533333	8.5	0.03	4	0.0003	-0.011696	8.52252e-06

## Sheet: pH_metadata
Variable	Description
id_article	Internal observation id
id_obs	Internal article id
author	First auhor
location	Site of the study
year	Year of publication
inv_sp	Invasive species
plant_or_animal	Type of invasive species
leg_type	Type of legacy
duration	Duration of the legacy (in months)
short_or_long_term	Duration of the legacy: short-term:< 5 years ("A"); long-term: > 5 years ("B")
control_mean	Control (uninvaded) mean
control_SD	Control (uninvaded) standard deviation
control_N	Control (uninvaded) sample size
control_VAR	Control (uninvaded) variance
response_mean	Response (after invasion) mean
response_SD	Response (after invasion) standard deviation
response_N	Response (after invasion) sample size
response_VAR	Response (after invasion) variance
lnRR	Effect size (expressed as ln-Response-Ratio)
var_ln	Variance of the effect size
