# Supplementary material
Source: Research Square preprint supplement (doi:10.21203/rs.3.rs-10244607/v1)
Supplement: Supplementary file 7 [file f91c113341ff3ffb8c1543b6.xlsx]

## Sheet: cover_or_biomass_data
id_article	id_obs	author	location	year	inv_sp	plant_or_animal	leg_type	duration	short_or_long_term	response_variable	control_mean	control_SD	control_N	control_VAR	response_mean	response_SD	response_N	response_VAR	lnRR	var_ln
1	1	Le Roux	Australia, Critically Endangered Cumberland Plain Woodland (CPW)	2024	Olea europaea	Plant	Biological	240	B	Cover_biomass	total biomass	1.91	0.05675	15	0.00023004	1.77	0.15875	15	0.00180011	-0.0761237	0.000595131
1	2	Le Roux	Australia, Critically Endangered Cumberland Plain Woodland (CPW)	2024	Olea europaea	Plant	Biological	240	B	Cover_biomass	total biomass	1.15	0.0675	15	0.000325446	1.73	0.15375	15	0.0016885	0.408359	0.000756237
2	3	Singh	Lac Du Bios Grasslands Protected Area, British Columbia, Canada (N50◦47′ , W120◦26′ )	2022	spotted knapweed (Centaurea stoebe)	Plant	Biological	4	A	Cover_biomass	Biomass	0.63157	1.013	40	0.026312	0.5921	1.0657	40	0.0291209	-0.0645332	0.145303
3	4	Slesak	Matlock, Washington (WA) (47.206° N, 123.442° W) and Molalla, Oregon (OR) (45.196° N, 122.285° W) USA	2022	Scotch broom	Plant	Biological	48	A	Cover_biomass	% Native cover	129.7	8.1	4	21.87	69.1	8.1	4	21.87	-0.629669	0.00441027
3	5	Slesak	Matlock, Washington (WA) (47.206° N, 123.442° W) and Molalla, Oregon (OR) (45.196° N, 122.285° W) USA	2022	Scotch broom	Plant	Biological	48	A	Cover_biomass	% Native cover	267.8	8.4	4	23.52	196.5	8.4	4	23.52	-0.309578	0.000702817
4	6	Ahmad	Kashmir Himalaya (32◦20′ to 34◦54′ N and 73◦55′ to 75◦35′ E)	2021	Leucanthemum vulgare	Plant	Biological	2	A	Cover_biomass	Native plant cover (%)	74	22.2	10	54.76	70	12.9	10	18.49	-0.0555699	0.0123961
4	7	Ahmad	Kashmir Himalaya (32◦20′ to 34◦54′ N and 73◦55′ to 75◦35′ E)	2021	Leucanthemum vulgare	Plant	Biological	14	A	Cover_biomass	Native plant cover (%)	74	22.2	10	54.76	64.3	9.74	10	10.5408	-0.140505	0.0112945
4	8	Ahmad	Kashmir Himalaya (32◦20′ to 34◦54′ N and 73◦55′ to 75◦35′ E)	2021	Leucanthemum vulgare	Plant	Biological	26	A	Cover_biomass	Native plant cover (%)	74	22.2	10	54.76	70.2	13.3	10	19.6544	-0.0527168	0.0125895
5	9	Sample	Nahuel Huapi National Park (Parque Nacional Nahuel Huapi, 147 PNNH), on Isla Victoria (40° 58´09´´ S, 71° 31´19´´ W)	2019	Pinus ponderosa, Pinus contorta, Pinus sylvestris, Pseudotsuga menziesii.	Plant	Biological	120	B	Cover_biomass	% Cover Native	5.6	1.2	30	0.0496552	0.06	0.04	102	1.58416e-05	-4.53618	0.00588791
5	10	Sample	Nahuel Huapi National Park (Parque Nacional Nahuel Huapi, 147 PNNH), on Isla Victoria (40° 58´09´´ S, 71° 31´19´´ W)	2019	Pinus ponderosa, Pinus contorta, Pinus sylvestris, Pseudotsuga menziesii.	Plant	Biological	120	B	Cover_biomass	-	3.73	1.57	30	0.0849966	0.05	0.04	102	1.58416e-05	-4.31214	0.0121801
5	11	Sample	Nahuel Huapi National Park (Parque Nacional Nahuel Huapi, 147 PNNH), on Isla Victoria (40° 58´09´´ S, 71° 31´19´´ W)	2019	Pinus ponderosa, Pinus contorta, Pinus sylvestris, Pseudotsuga menziesii.	Plant	Biological	120	B	Cover_biomass	-	9.15	1.42	30	0.069531	7.57	1.69	102	0.0282782	-0.189561	0.00129144
6	12	Carter	Matlock, WA, USA, (47.215N, 123.417W)	2019	Scotch broom	Plant	Biological	36	A	Cover_biomass	% cover natives	1	0.2	20	0.00210526	0.6	3.8	20	0.76	-0.510826	2.00756
7	13	Allen	Louisiana State University (30.36° N, -91.14° W)	2018	P. australis: european, and gulf lineages	Plant	Biological	24	A	Cover_biomass	Biomass	20.63	1.495	10	0.248336	20.476	1	10	0.111111	-0.00749286	0.000763662
7	14	Allen	Louisiana State University (30.36° N, -91.14° W)	2018	P. australis: european, and gulf lineages	Plant	Biological	24	A	Cover_biomass	Biomass	20.63	1.495	10	0.248336	20.793	1	10	0.111111	0.00787006	0.000756445
8	15	Fuselier	Kentucky Cherokee Park (388140 40.200N, 858410 42.7200W)	2018	Lonicera mackii	Plant	Biological	72	B	Cover_biomass	No. ind.	8.7	13.72	96	1.98146	4.5	17.64	96	3.27547	-0.659246	0.185973
9	16	Maclean	Scotland in Argyll, Kintyre and Lochaber, between 55°76′N and 56°90′N,	2017	Rhododendron ponticum	Plant	Biological	120	B	Cover_biomass	mean proportional forbs	0.191136	0.143305	6	0.00410729	0.0377039	0.0583695	11	0.000340699	-1.62322	0.311563
9	17	Maclean	Scotland in Argyll, Kintyre and Lochaber, between 55°76′N and 56°90′N,	2017	Rhododendron ponticum	Plant	Biological	180	B	Cover_biomass	mean proportional forbs	0.191136	0.143305	6	0.00410729	0.0305944	0.040821	11	0.000166635	-1.83217	0.25553
9	18	Maclean	Scotland in Argyll, Kintyre and Lochaber, between 55°76′N and 56°90′N,	2017	Rhododendron ponticum	Plant	Biological	240	B	Cover_biomass	mean proportional forbs	0.191136	0.143305	6	0.00410729	0.0469423	0.0318305	5	0.000253296	-1.40407	0.185647
9	19	Maclean	Scotland in Argyll, Kintyre and Lochaber, between 55°76′N and 56°90′N,	2017	Rhododendron ponticum	Plant	Biological	360	B	Cover_biomass	mean proportional forbs	0.191136	0.143305	6	0.00410729	0.0110304	0.0246647	5	0.000152087	-2.85233	1.09369
9	20	Maclean	Scotland in Argyll, Kintyre and Lochaber, between 55°76′N and 56°90′N,	2017	Rhododendron ponticum	Plant	Biological	120	B	Cover_biomass	mean proportional woody	0.0941757	0.139052	6	0.00386709	0.102298	0.077211	11	0.000596153	0.0827318	0.415138
9	21	Maclean	Scotland in Argyll, Kintyre and Lochaber, between 55°76′N and 56°90′N,	2017	Rhododendron ponticum	Plant	Biological	180	B	Cover_biomass	mean proportional woody	0.0941757	0.139052	6	0.00386709	0.133343	0.0927727	11	0.000860677	0.34776	0.407356
9	22	Maclean	Scotland in Argyll, Kintyre and Lochaber, between 55°76′N and 56°90′N,	2017	Rhododendron ponticum	Plant	Biological	240	B	Cover_biomass	mean proportional woody	0.0941757	0.139052	6	0.00386709	0.218171	0.148968	5	0.00554785	0.840118	0.456594
9	23	Maclean	Scotland in Argyll, Kintyre and Lochaber, between 55°76′N and 56°90′N,	2017	Rhododendron ponticum	Plant	Biological	360	B	Cover_biomass	mean proportional woody	0.0941757	0.139052	6	0.00386709	0.16965	0.222841	5	0.0124145	0.588578	0.708423
9	24	Maclean	Scotland in Argyll, Kintyre and Lochaber, between 55°76′N and 56°90′N,	2017	Rhododendron ponticum	Plant	Biological	120	B	Cover_biomass	mean proportional ferns	0.0492207	0.0276435	6	0.000152833	0.037652	0.0471673	11	0.000222476	-0.267929	0.195234
9	25	Maclean	Scotland in Argyll, Kintyre and Lochaber, between 55°76′N and 56°90′N,	2017	Rhododendron ponticum	Plant	Biological	180	B	Cover_biomass	mean proportional ferns	0.0492207	0.0276435	6	0.000152833	0.0283444	0.0269484	11	7.26216e-05	-0.551884	0.134745
9	26	Maclean	Scotland in Argyll, Kintyre and Lochaber, between 55°76′N and 56°90′N,	2017	Rhododendron ponticum	Plant	Biological	240	B	Cover_biomass	mean proportional ferns	0.0492207	0.0276435	6	0.000152833	0.00790853	0.00947638	5	2.24504e-05	-1.82837	0.33973
9	27	Maclean	Scotland in Argyll, Kintyre and Lochaber, between 55°76′N and 56°90′N,	2017	Rhododendron ponticum	Plant	Biological	360	B	Cover_biomass	mean proportional ferns	0.0492207	0.0276435	6	0.000152833	0.00653119	0.0146042	5	5.33205e-05	-2.01972	1.05257
9	28	Maclean	Scotland in Argyll, Kintyre and Lochaber, between 55°76′N and 56°90′N,	2017	Rhododendron ponticum	Plant	Biological	120	B	Cover_biomass	mean proportional grass	0.266491	0.125377	6	0.00314386	0.0864855	0.14073	11	0.00198048	-1.12536	0.277599
9	29	Maclean	Scotland in Argyll, Kintyre and Lochaber, between 55°76′N and 56°90′N,	2017	Rhododendron ponticum	Plant	Biological	180	B	Cover_biomass	mean proportional grass	0.266491	0.125377	6	0.00314386	0.156934	0.122656	11	0.00150445	-0.529517	0.0924237
9	30	Maclean	Scotland in Argyll, Kintyre and Lochaber, between 55°76′N and 56°90′N,	2017	Rhododendron ponticum	Plant	Biological	240	B	Cover_biomass	mean proportional grass	0.266491	0.125377	6	0.00314386	0.0906093	0.064345	5	0.00103507	-1.07878	0.137749
9	31	Maclean	Scotland in Argyll, Kintyre and Lochaber, between 55°76′N and 56°90′N,	2017	Rhododendron ponticum	Plant	Biological	360	B	Cover_biomass	mean proportional grass	0.266491	0.125377	6	0.00314386	0.0679328	0.0626671	5	0.000981793	-1.36682	0.207087
9	32	Maclean	Scotland in Argyll, Kintyre and Lochaber, between 55°76′N and 56°90′N,	2017	Rhododendron ponticum	Plant	Biological	120	B	Cover_biomass	mean proportional bryophites	0.398976	0.159105	6	0.00506285	0.73586	0.201368	11	0.00405491	0.612139	0.0333122
9	33	Maclean	Scotland in Argyll, Kintyre and Lochaber, between 55°76′N and 56°90′N,	2017	Rhododendron ponticum	Plant	Biological	180	B	Cover_biomass	mean proportional bryophites	0.398976	0.159105	6	0.00506285	0.650785	0.206025	11	0.00424464	0.489277	0.0356157
9	34	Maclean	Scotland in Argyll, Kintyre and Lochaber, between 55°76′N and 56°90′N,	2017	Rhododendron ponticum	Plant	Biological	240	B	Cover_biomass	mean proportional bryophites	0.398976	0.159105	6	0.00506285	0.636369	0.136484	5	0.00465694	0.466876	0.0357042
9	35	Maclean	Scotland in Argyll, Kintyre and Lochaber, between 55°76′N and 56°90′N,	2017	Rhododendron ponticum	Plant	Biological	360	B	Cover_biomass	mean proportional bryophites	0.398976	0.159105	6	0.00506285	0.744855	0.225941	5	0.0127623	0.624288	0.044907
10	36	Szitar	Kiskunság, Hungary.	2014	Pinus nigra and Pinus sylvestris	Plant	Biological	60	A	Cover_biomass	% Cover	69.14	275.989	10	8463.35	52	154.902	10	2666.08	-0.28489	2.48078
10	37	Szitar	Kiskunság, Hungary.	2014	Pinus nigra and Pinus sylvestris	Plant	Biological	60	A	Cover_biomass	% Cover	36.57	163.8	10	2981.17	40.86	151.748	10	2558.61	0.110923	3.38549
11	38	Dickie	Craigieburn Forest Park, Canterbury, New Zealand (4389′ 04′′S, 171843′ 52′′E)	2014	Pinus contorta	Plant	Biological	36	A	Cover_biomass	% native Cover	49.4	6.6	6	8.712	13.17	13.06	5	42.6409	-1.32201	0.199648
11	39	Dickie	Craigieburn Forest Park, Canterbury, New Zealand (4389′ 04′′S, 171843′ 52′′E)	2014	Pinus contorta	Plant	Biological	36	A	Cover_biomass	-	9	2	6	0.8	4.11	1.5	5	0.5625	-0.783802	0.0348701
11	40	Dickie	Craigieburn Forest Park, Canterbury, New Zealand (4389′ 04′′S, 171843′ 52′′E)	2014	Pinus contorta	Plant	Biological	36	A	Cover_biomass	-	8.23	3.26	6	2.12552	4.94	3.12	5	2.4336	-0.510421	0.105929
12	41	Von Holle	Cape Cod National Seashore (Masachusetts)	2013	Robinia pseudoacacia	Plant	Biological	240	B	Cover_biomass	native % cover	107	22.6103	10	56.8028	50.44	16.2857	10	29.4694	-0.752044	0.01489
13	42	Hughes	Tutuila Island of American Samoa	2012	Falcataria moluccana	Plant	Biological	132	B	Cover_biomass	Native Biomass	221.8	37.5659	5	352.8	158.9	32.6466	5	266.45	-0.333501	0.0141794
13	43	Hughes	Tutuila Island of American Samoa	2012	Falcataria moluccana	Plant	Biological	132	B	Cover_biomass	Total Biomass	251.3	37.1187	5	344.45	163.8	28.8453	5	208.012	-0.428001	0.0105657
13	44	Hughes	Tutuila Island of American Samoa	2012	Falcataria moluccana	Plant	Biological	108	B	Cover_biomass	Native Biomass	221.8	37.5659	5	352.8	202	70.2125	5	1232.45	-0.0935084	0.0299005
13	45	Hughes	Tutuila Island of American Samoa	2012	Falcataria moluccana	Plant	Biological	108	B	Cover_biomass	Total Biomass	251.3	37.1187	5	344.45	211.9	61.9391	5	959.112	-0.170533	0.0214517
13	46	Hughes	Tutuila Island of American Samoa	2012	Falcataria moluccana	Plant	Biological	72	B	Cover_biomass	Native Biomass	221.8	37.5659	5	352.8	138	18.3358	5	84.05	-0.474522	0.00926791
13	47	Hughes	Tutuila Island of American Samoa	2012	Falcataria moluccana	Plant	Biological	72	B	Cover_biomass	Total Biomass	251.3	37.1187	5	344.45	152.9	23.0315	5	132.613	-0.496863	0.00890141
13	48	Hughes	Tutuila Island of American Samoa	2012	Falcataria moluccana	Plant	Biological	60	A	Cover_biomass	Native Biomass	221.8	37.5659	5	352.8	119.5	30.8577	5	238.05	-0.61846	0.019073
13	49	Hughes	Tutuila Island of American Samoa	2012	Falcataria moluccana	Plant	Biological	60	A	Cover_biomass	Total Biomass	251.3	37.1187	5	344.45	127.9	32.6466	5	266.45	-0.675399	0.0173941
13	50	Hughes	Tutuila Island of American Samoa	2012	Falcataria moluccana	Plant	Biological	132	B	Cover_biomass	Native Density	4179	2526.76	5	1596125	8378	4326.79	5	4.68028e+06	0.695537	0.126459
13	51	Hughes	Tutuila Island of American Samoa	2012	Falcataria moluccana	Plant	Biological	132	B	Cover_biomass	Total Density	4639	2329.98	5	1357205	8504	4284.31	5	4588820	0.606038	0.101216
13	52	Hughes	Tutuila Island of American Samoa	2012	Falcataria moluccana	Plant	Biological	108	B	Cover_biomass	Native Density	4179	2526.76	5	1596125	6909	1301.39	5	423405	0.502753	0.080212
13	53	Hughes	Tutuila Island of American Samoa	2012	Falcataria moluccana	Plant	Biological	108	B	Cover_biomass	Total Density	4639	2329.98	5	1357205	7303	1247.73	5	389205	0.453786	0.056291
13	54	Hughes	Tutuila Island of American Samoa	2012	Falcataria moluccana	Plant	Biological	72	B	Cover_biomass	Native Density	4179	2526.76	5	1596125	4568	1500.4	5	562801	0.0890035	0.094693
13	55	Hughes	Tutuila Island of American Samoa	2012	Falcataria moluccana	Plant	Biological	72	B	Cover_biomass	Total Density	4639	2329.98	5	1357205	5254	1156.05	5	334111	0.124491	0.0601358
13	56	Hughes	Tutuila Island of American Samoa	2012	Falcataria moluccana	Plant	Biological	60	B	Cover_biomass	Native Density	4179	2526.76	5	1596125	5457	1545.12	5	596851	0.266827	0.0891502
13	57	Hughes	Tutuila Island of American Samoa	2012	Falcataria moluccana	Plant	Biological	60	B	Cover_biomass	Total Density	4639	2329.98	5	1357205	8078	3984.67	5	3969405	0.554645	0.099117
14	58	Rook	-	2011	Cytisus scoparius	Plant	Biological	48	A	Cover_biomass	% cover natives	29.06	15.38	20	12.4497	40.17	11.11	20	6.49643	0.323758	0.0178299
14	59	Rook	-	2011	Cytisus scoparius	Plant	Biological	12	A	Cover_biomass	% cover natives	29.06	15.38	20	12.4497	33.33	13.67	20	9.83521	0.137095	0.0224161
14	60	Rook	-	2011	Cytisus scoparius	Plant	Biological	48	A	Cover_biomass	%total cover	65.81	28.21	20	41.8844	68.37	17.1	20	15.39	0.0381623	0.0123151
14	61	Rook	-	2011	Cytisus scoparius	Plant	Biological	12	A	Cover_biomass	%total cover	65.81	28.21	20	41.8844	58.97	17.95	20	16.958	-0.109743	0.0138201
15	62	Holdredge	Adolf Rotundo Wildlife Sanctuary (41_x0003_460 36.8500N, 71_x0003_170 2.2400W) on the Palmer River in Rehoboth, Massachusetts, USA	2011	Phragmites australis	Plant	Biological	4	A	Cover_biomass	%cover/plot	18.75	11.4636	6	26.2829	59.37	11.4636	6	26.2829	1.1526	0.068514
15	63	Holdredge	Adolf Rotundo Wildlife Sanctuary (41_x0003_460 36.8500N, 71_x0003_170 2.2400W) on the Palmer River in Rehoboth, Massachusetts, USA	2011	Phragmites australis	Plant	Biological	4	A	Cover_biomass	%cover/plot	32.81	19.1305	6	73.1953	45.31	19.1305	6	73.1953	0.322794	0.0863725
15	64	Holdredge	Adolf Rotundo Wildlife Sanctuary (41_x0003_460 36.8500N, 71_x0003_170 2.2400W) on the Palmer River in Rehoboth, Massachusetts, USA	2011	Phragmites australis	Plant	Biological	4	A	Cover_biomass	%cover/plot	9.375	11.4832	6	26.3728	23.44	30.5206	6	186.302	0.916397	0.53262
15	65	Holdredge	Adolf Rotundo Wildlife Sanctuary (41_x0003_460 36.8500N, 71_x0003_170 2.2400W) on the Palmer River in Rehoboth, Massachusetts, USA	2011	Phragmites australis	Plant	Biological	4	A	Cover_biomass	%cover/plot	6.3	7.47094	6	11.163	10.94	11.4881	6	26.3953	0.551876	0.418164
15	66	Holdredge	Adolf Rotundo Wildlife Sanctuary (41_x0003_460 36.8500N, 71_x0003_170 2.2400W) on the Palmer River in Rehoboth, Massachusetts, USA	2011	Phragmites australis	Plant	Biological	4	A	Cover_biomass	%cover/plot	4.7	0	6	0	14.06	15.2848	6	46.7251	1.09577	0.196969
15	67	Holdredge	Adolf Rotundo Wildlife Sanctuary (41_x0003_460 36.8500N, 71_x0003_170 2.2400W) on the Palmer River in Rehoboth, Massachusetts, USA	2011	Phragmites australis	Plant	Biological	4	A	Cover_biomass	Biomass	6.25	15.3093	6	46.875	40.62	15.3093	6	46.875	1.87168	1.02367
15	68	Holdredge	Adolf Rotundo Wildlife Sanctuary (41_x0003_460 36.8500N, 71_x0003_170 2.2400W) on the Palmer River in Rehoboth, Massachusetts, USA	2011	Phragmites australis	Plant	Biological	4	A	Cover_biomass	Biomass	15.62	22.0454	6	97.2	25	22.0454	6	97.2	0.470324	0.461588
15	69	Holdredge	Adolf Rotundo Wildlife Sanctuary (41_x0003_460 36.8500N, 71_x0003_170 2.2400W) on the Palmer River in Rehoboth, Massachusetts, USA	2011	Phragmites australis	Plant	Biological	4	A	Cover_biomass	Biomass	6.25	7.6669	6	11.7563	15.62	7.6669	6	11.7563	0.915971	0.290954
16	70	Jordan	North Dakota and Montana	2011	Bromus, Agropyron and Euphorbia	Plant	Biological	3	A	Cover_biomass	Biomass	0.039	0.002	4	1.33333e-06	0.017	0.01	4	3.33333e-05	-0.830348	0.0871627
16	71	Jordan	North Dakota and Montana	2011	Bromus, Agropyron and Euphorbia	Plant	Biological	3	A	Cover_biomass	-	0.039	0.002	4	1.33333e-06	0.025	0.005	4	8.33333e-06	-0.444686	0.0106575
16	72	Jordan	North Dakota and Montana	2011	Bromus, Agropyron and Euphorbia	Plant	Biological	3	A	Cover_biomass	-	0.039	0.002	4	1.33333e-06	0.014	0.008	4	2.13333e-05	-1.0245	0.0822901
16	73	Jordan	North Dakota and Montana	2011	Bromus, Agropyron and Euphorbia	Plant	Biological	3	A	Cover_biomass	-	0.039	0.003	4	3e-06	0.014	0.01	4	3.33333e-05	-1.0245	0.12903
16	74	Jordan	North Dakota and Montana	2011	Bromus, Agropyron and Euphorbia	Plant	Biological	3	A	Cover_biomass	-	0.039	0.003	4	3e-06	0.021	0.008	4	2.13333e-05	-0.619039	0.0377605
16	75	Jordan	North Dakota and Montana	2011	Bromus, Agropyron and Euphorbia	Plant	Biological	3	A	Cover_biomass	-	0.039	0.003	4	3e-06	0.049	0.007	4	1.63333e-05	0.228259	0.00658133
16	76	Jordan	North Dakota and Montana	2011	Bromus, Agropyron and Euphorbia	Plant	Biological	3	A	Cover_biomass	-	0.026	0.001	4	3.33333e-07	0.024	0.003	4	3e-06	-0.0800427	0.00427607
16	77	Jordan	North Dakota and Montana	2011	Bromus, Agropyron and Euphorbia	Plant	Biological	3	A	Cover_biomass	-	0.026	0.001	4	3.33333e-07	0.028	0.002	4	1.33333e-06	0.074108	0.00164533
16	78	Jordan	North Dakota and Montana	2011	Bromus, Agropyron and Euphorbia	Plant	Biological	3	A	Cover_biomass	-	0.026	0.001	4	3.33333e-07	0.012	0.004	4	5.33333e-06	-0.77319	0.0281476
16	79	Jordan	North Dakota and Montana	2011	Bromus, Agropyron and Euphorbia	Plant	Biological	3	A	Cover_biomass	-	0.0037	0.0014	4	6.53333e-07	0.0037	0.0044	4	6.45333e-06	0	0.389335
16	80	Jordan	North Dakota and Montana	2011	Bromus, Agropyron and Euphorbia	Plant	Biological	3	A	Cover_biomass	-	0.0037	0.0014	4	6.53333e-07	0.004	0.0034	4	3.85333e-06	0.0779615	0.216418
16	81	Jordan	North Dakota and Montana	2011	Bromus, Agropyron and Euphorbia	Plant	Biological	3	A	Cover_biomass	-	0.0037	0.0014	4	6.53333e-07	0.0044	0.0047	4	7.36333e-06	0.173272	0.321046
16	82	Jordan	North Dakota and Montana	2011	Bromus, Agropyron and Euphorbia	Plant	Biological	3	A	Cover_biomass	-	0.04	0.002	4	1.33333e-06	0.017	0.002	4	1.33333e-06	-0.855666	0.00408521
16	83	Jordan	North Dakota and Montana	2011	Bromus, Agropyron and Euphorbia	Plant	Biological	3	A	Cover_biomass	-	0.04	0.002	4	1.33333e-06	0.027	0.009	4	2.7e-05	-0.393043	0.0284028
16	84	Jordan	North Dakota and Montana	2011	Bromus, Agropyron and Euphorbia	Plant	Biological	3	A	Cover_biomass	-	0.04	0.002	4	1.33333e-06	0.023	0.007	4	1.63333e-05	-0.553385	0.0237819
16	85	Jordan	North Dakota and Montana	2011	Bromus, Agropyron and Euphorbia	Plant	Biological	3	A	Cover_biomass	-	0.04	0.004	4	5.33333e-06	0.007	0.01	4	3.33333e-05	-1.74297	0.512704
16	86	Jordan	North Dakota and Montana	2011	Bromus, Agropyron and Euphorbia	Plant	Biological	3	A	Cover_biomass	-	0.04	0.004	4	5.33333e-06	0.013	0.011	4	4.03333e-05	-1.12393	0.181494
16	87	Jordan	North Dakota and Montana	2011	Bromus, Agropyron and Euphorbia	Plant	Biological	3	A	Cover_biomass	-	0.04	0.004	4	5.33333e-06	0.096	0.004	4	5.33333e-06	0.875469	0.00293403
17	88	Grman	California	2010	Black mustard [Brassica nigra (L.) W.D.J. Koch], an annual forb; Soft brome [Bromus hordeaceus L.], an annual grass; and Redstem stork’s bill [Erodium cicutarium (L.) L’He ́r. ex Aiton], a biennial forb).	Plant	Biological	1.25	A	Cover_biomass	Biomass	0.74	0.291033	7	0.0141167	0.092	0.0608523	7	0.000617167	-2.08486	0.0845964

## Sheet: cover_or_biomass_metadata
Variable	Description
id_article	Internal observation id
id_obs	Internal article id
author	First auhor
location	Site of the study
year	Year of publication
inv_sp	Invasive species
plant_or_animal	Type of invasive species
leg_type	Type of legacy
duration	Duration of the legacy (in months)
short_or_long_term	Duration of the legacy: short-term:< 5 years ("A"); long-term: > 5 years ("B")
response_variable	Response associated with cover or biomass
control_mean	Control (uninvaded) mean
control_SD	Control (uninvaded) standard deviation
control_N	Control (uninvaded) sample size
control_VAR	Control (uninvaded) variance
response_mean	Response (after invasion) mean
response_SD	Response (after invasion) standard deviation
response_N	Response (after invasion) sample size
response_VAR	Response (after invasion) variance
lnRR	Effect size (expressed as ln-Response-Ratio)
var_ln	Variance of the effect size
